1 **Alternative oxidase induction protects *Candida albicans***  
2 **from respiratory stress and promotes hyphal growth**

3

4 <sup>1</sup>Lucian Duvenage, <sup>2</sup>Louise A. Walker, <sup>3</sup>Aleksandra Bojarczuk, <sup>3</sup>Simon A. Johnston, <sup>2</sup>Donna  
5 M. McCallum, <sup>2</sup>Carol A. Munro and <sup>1\*</sup>Campbell W. Gourlay

6

7

8 <sup>1</sup>Kent Fungal Group, School of Biosciences, University of Kent, Kent, CT2 9HY, UK.

9

10 <sup>2</sup>MRC Centre for Medical Mycology at the University of Aberdeen, Institute of Medical  
11 Sciences, Foresterhill, Aberdeen AB25 2ZD

12

13 <sup>3</sup>Department of Infection, Immunity & Cardiovascular Disease and Bateson Centre, University  
14 of Sheffield, Firth Court, Western Bank Sheffield, S10 2TN, UK

15

16

17 \*Authors for correspondence

18

19

20 **Working title** – AOX function in *Candida albicans*

21 **Abstract**

22 The human fungal pathogen *Candida albicans* possesses two genes expressing a  
23 cyanide-insensitive Alternative Oxidase (Aox) enzymes in addition to classical and  
24 parallel electron transfer chains (ETC). In this study, we examine the role of Aox in *C.*  
25 *albicans* under conditions of respiratory stress, which may be inflicted during its  
26 interaction with the human host or co-colonising bacteria. We find that the level of Aox  
27 expression is sufficient to modulate resistance to classical ETC inhibition under  
28 respiratory stress and are linked to gene expression changes that can promote both  
29 survival and pathogenicity. For example we demonstrate that Aox function is important  
30 for the regulation of filamentation in *C. albicans* and observe that cells lacking Aox  
31 function lose virulence in a zebrafish infection model. Our investigations also identify  
32 that pyocyanin, a phenazine produced by the co-colonising bacterium  
33 *Pseudomonas aeruginosa*, inhibits Aox-based respiration in *C. albicans*. These results  
34 suggest that Aox plays important roles within respiratory stress response pathways  
35 which *C. albicans* may utilise both as a commensal organism and as a pathogen.

36

## 37 **Introduction**

38 *C. albicans* is a commensal yeast which is found in the majority of the population.  
39 However it is also a major fungal pathogen of humans and a leading cause of hospital-  
40 acquired infections which have a high mortality rate (Edmond et al., 1999). *C. albicans*  
41 is Crabtree Negative yeast that relies largely on respiration to produce energy for  
42 growth and is highly adaptable in its use and assimilation of a variety of carbon sources  
43 (Ene et al., 2012). Recent work has identified a number of fungal-specific subunits of  
44 mitochondrial Complex I raising the possibility of the development of novel antifungals  
45 that target this organelle (She et al., 2015). Although the importance of mitochondrial  
46 function for growth and proliferation of *C. albicans* is recognised, the influence of  
47 alternative pathways of respiration remain to be fully explored.

48

49 In addition to the classical electron transfer chain (ETC), *C. albicans* possesses a  
50 cyanide-insensitive alternative pathway, not found in mammals, which permits  
51 respiration when the ETC is inhibited (Huh and Kang, 1999). This pathway relies on  
52 an alternative oxidase (Aox), of which two isoforms exist. Aox1 is a low-abundance  
53 isoform that is constitutively expressed while Aox2 can be rapidly induced in response  
54 to inhibition of classical respiration (Huh and Kang, 2001). Aox activity is not coupled  
55 to the generation of a proton gradient across the mitochondrial membrane, and thus  
56 alternate respiration produces significantly less ATP than the classical oxidative  
57 phosphorylation (Helmerhorst et al., 2002). This suggests that Aox based respiration  
58 does not play a key role in energy production but likely permits respiration under  
59 conditions of classical chain inhibition. Metabolomic analyses indicate that inhibition  
60 of the ETC is associated with changes in the purine nucleotide cycle, as well as a

61 depletion in TCA cycle intermediates and aspartate (Balcke et al., 2011). In this  
62 context Aox induction may be crucial as respiration provides electron acceptors to  
63 support the biosynthesis of aspartate, which is considered as one of the limiting factors  
64 for cell proliferation (Sullivan et al., 2015). Sustained respiration is also important as  
65 mitochondria play a key role in the synthesis of several lipids that support growth and  
66 cell maintenance. The import of phosphatidylserine into mitochondria to generate  
67 phosphatidylethanolamine, an important constituent of the plasma membrane, is an  
68 example of this function (Miyata et al., 2016). The ability of Aox to maintain respiration  
69 under conditions of classical ETC inhibition is therefore likely to support biosynthetic  
70 pathways required for growth.

71

72 An alternative oxidase system is found in all plants, most fungi, algae, and some  
73 protists (Rogov and Zvyagilskaya, 2015). Aox is located in the inner mitochondrial  
74 membrane where it receives electrons from reduced ubiquinone and catalyzes the  
75 reduction of oxygen to water. The catalytic core of Aox is formed by a four- $\alpha$ -helix  
76 bundle, containing the di-iron catalytic site, flanked by two additional  $\alpha$ -helices  
77 anchoring the protein to the membrane (Siedow and Umbach, 1995). Studies of  
78 *Pichia stipitis* and *Neurospora crassa* indicate that fungal Aox differs from Aox in plants  
79 in that it occurs as a monomer and is not induced by  $\alpha$ -keto acids such as pyruvate  
80 (Umbach and Siedow, 2000). Another unique feature of fungal Aox is that its activity  
81 is stimulated by purine nucleotides such as AMP, ADP and GMP (Sakajo et al., 1997;  
82 Vanderleyden et al., 1980). The regulatory differences observed may suggest that Aox  
83 participates within different physiological processes in fungal and plant species.

84

85 In plant fungal pathogens such as *Ustilago maydis*, *Moniliophthora perniciosa* and  
86 *Sclerotinia sclerotiorum*, Aox is reported to be more active during the mycelial growth  
87 phase suggesting that the metabolic control afforded by alternative respiration is an  
88 important factor in morphogenesis (Juárez et al., 2006; Thomazella et al., 2012; Xu et  
89 al., 2012). In the human fungal pathogen *Aspergillus fumigatus* AoxA was found to  
90 contribute to oxidative stress resistance and to resistance to killing by macrophages  
91 (Magnani et al., 2008) but was not essential for virulence *in vivo* (Grahl et al., 2012).  
92 In *Cryptococcus neoformans* the sole alternative oxidase Aox1 is induced at 37 °C  
93 and plays a significant role in virulence in the murine inhalation model (Akhter et al.,  
94 2003). In *Paracoccidioides brasiliensis* Aox has roles in morphological transition and  
95 in virulence by mediating resistance to oxidative stress imposed by immune cells  
96 (Hernández et al., 2015; Hernández Ruiz et al., 2011).

97

98 It has been proposed that in *C. albicans* Aox may also function in oxidative stress  
99 resistance, as oxidative agents can induce AOX2 expression (Huh and Kang, 2001).  
100 This is supported by the observation that the induction of Aox2 provides resistance to  
101 fluconazole, which has been shown to elevate ROS levels as part of its fungistatic  
102 action (Yan et al., 2009). Inhibition of Aox with benzhydroxamic acid significantly  
103 raised the ratio of oxidised/reduced glutathione, suggesting that Aox may also have a  
104 role in maintaining redox balance (Ruy et al., 2006). Controlling the partitioning of  
105 electrons between cytochrome c oxidase and Aox has also been proposed to provide  
106 the respiratory system with flexibility regarding ATP demand and maintaining cellular  
107 redox balance (Vanlerberghe, 2013). Although the contribution of the alternative  
108 pathway to total respiration is minimal in dividing yeast cells, it has been reported to

109 be more active in hyphal (Guedouari et al., 2014) and aged cells (Helmerhorst et al.,  
110 2005).

111

112 Given that Aox is not found within mammals it has been proposed as a potential drug  
113 target for control of plant fungal pathogens. However Aox support of respiration is  
114 reported as one of the mechanisms of resistance to QoI antifungals (which inhibit  
115 fungal respiration by binding to the Qo site of the cytochrome *bc<sub>1</sub>* complex of the  
116 classical ETC) proposed for use to control plant pathogens (e.g. the strobilurins)  
117 (Fernández-Ortuño et al., 2008). Examples of plant fungal pathogens in which  
118 alternative respiration was shown to confer resistance include *Zymoseptoria tritici*  
119 (Miguez et al., 2004) and *Botrytis cinerea* (Ishii et al., 2009). Aox has also been  
120 targeted in the eukaryotic parasite *Trypanosoma brucei*, which cause African sleeping  
121 sickness (Menziés et al., 2018). Therapies targeting Aox in these organisms using  
122 drugs such as salicylhydroxamic acid (SHAM) or ascofuranone have demonstrated  
123 efficacy of Aox inhibition with small molecules (Brohn and Clarkson Jr., 1978; Yabu  
124 et al., 2003). The hydroxynaphthoquinone class of molecules, including Atovaquone,  
125 also act by inhibiting the Qo site within the ETC and have been shown to be effective  
126 against malaria parasites as well as the opportunistic fungal pathogen *Pneumocystis*  
127 *jirovecii* (Fisher and Meunier, 2008). Alternative oxidase inhibitors were shown to be  
128 synergistic with Atovaquone against *Plasmodium falciparum* (Murphy and Lang-  
129 unnasch, 1999), showing that simultaneous inhibition of the classical and alterative  
130 pathways is more effective, and highlights the importance of Aox as a drug target.

131

132 The clear necessity of the alternative pathway for resistance to inhibition of classical  
133 respiration may be relevant to *C. albicans* fitness and survival under certain conditions.  
134 For example, nitric oxide (NO) is produced by phagocytes as a broad-spectrum  
135 defence against microbes. NO and reactive nitrogen species such as peroxynitrite  
136 produced by macrophages in response to *C. albicans* can inhibit the classical  
137 respiratory pathway (Sharpe and Cooper, 1998). As Aox is not sensitive to NO it's  
138 expression may promote viability and escape from phagocytic cells. Certain bacteria  
139 that are found to colonise similar niches as fungal pathogens are known to produce  
140 compounds which inhibit respiration. An example is cyanide production by  
141 *Pseudomonas aeruginosa* in the cystic fibrosis lung (Lenney and Gilchrist, 2011), in  
142 which *C. albicans* is a common co-isolate (Chotirmall et al., 2010). Alternative  
143 respiration may therefore also function as a defence against respiration inhibition by  
144 competing microorganisms within mixed microbial communities.

145

146 In this study we examine the role of Aox in the resistance of *C. albicans* to respiratory  
147 stress which it may encounter within the human host and in co-existence with other  
148 microbes. We find that Aox activity is rapidly induced following exposure to respiratory  
149 stress, is important for hyphal induction and virulence and is targeted by the  
150 pyocyanin, a product of *P. aeruginosa*. Our data suggests Aox function may be  
151 important for both the commensal and pathogenic properties of *C. albicans* cells,  
152 providing a plausible explanation for its conservation.

153

## 154 **Materials and Methods**

### 155 **Growth conditions and chemicals**

156 *C. albicans* strains were maintained on YPD agar plates and grown in YPD in a 30 °C  
157 shaking incubator unless stated otherwise. The concentrations of sodium  
158 nitroprusside dihydrate (SNP) and salicylhydroxamic acid (SHAM) (Cat. No.'s 1.06541  
159 and S607, Sigma-Aldrich, Dorset, UK) used for inhibition were 1 mM and 0.5 mM  
160 respectively, and were added to log phase cells followed by 18 h growth unless stated  
161 otherwise. Potassium cyanide, Calcofluor White, Congo Red, pyocyanin (Cat. No.  
162 P0046) and methylene blue were obtained from Sigma-Aldrich.

163

### 164 **Construction of AOX deletion, re-integration and overexpression strains**

165 The strains used in this study are summarised in Table 1. The *aox1-aox2Δ* mutant  
166 was constructed from the wild type strain SN87 using the strategy as described in  
167 (Noble and Johnson, 2005). Briefly, *LEU2* and *HIS1* were amplified from plasmids  
168 pSN40 and pSN52 respectively, using universal primers with 80 bases homologous to  
169 the 5' end of *AOX2* and the 3' end of *AOX1* ORFs. This strategy was designed to  
170 delete both *AOX2* and *AOX1* simultaneously as well as the region between these two  
171 adjacent genes. The primers used were AOX2-UP2 and AOX1-UP5 (Table 2). *AOX2*  
172 only was disrupted to create the *aox2Δ* using a similar strategy by homologous  
173 recombination at the 5' and 3' ends of the *AOX2* open reading frame, using the primers  
174 AOX2-UP2 and AOX2-UP5. The PCR products were then transformed sequentially  
175 into *C. albicans* SN87 using an electroporation protocol (Thompson et al., 1998),  
176 followed by selection on agar plates containing Yeast Nitrogen Base without amino



177 acids supplemented with 2% glucose and -His or -Leu dropout powder (Formedium,  
178 UK) as appropriate.

179 *AOX2* ORF was amplified from genomic DNA using *AOX2* ORF F and *AOX2* ORF R  
180 (Table 2). The PCR product was digested with *Bam*I and *Xho*I (Promega, Madison,  
181 WI) and cloned into pNIM-1 (Park et al., 2005) replacing GFP. This construct was  
182 transformed into *C. albicans* strains by integration at the *ADH1* locus as described in  
183 (Park et al., 2005). Cells were grown at 30 °C in YPD for 16 h supplemented with 50  
184 µg/ml doxycycline to induce expression of *AOX2*. To verify the disruption or  
185 reintegration of *AOX2*, genomic DNA was extracted from *C. albicans* strains using  
186 standard the phenol-chloroform method (insert reference). The *AOX2* gene was  
187 amplified using *AOX2* ORF F and *AOX2* ORF R.

188 To examine induction of *AOX2* by KCN, *C. albicans* strains were grown to log phase  
189 in YPD and then treated with 1 mM KCN. Samples were taken at specified time points  
190 and RNA was extracted using a E.Z.N.A.® Yeast RNA Kit (Omega Bio-tek, Norcross,  
191 GA) using the manufacturer's instructions. cDNA was prepared using a Bio-Line  
192 SensiFAST™ cDNA Synthesis Kit (Cat. No. BIO-65053) as per the manufacturer's  
193 instructions. Standard PCR was then performed with 2 ng template cDNA per reaction,  
194 using *AOX2* ORF F and *AOX2* ORF R.

195

## 196 **RNA isolation and RNA sequencing**

197 *C. albicans* wild-type SC5314 and *aox2*Δ were grown for 5 hours in YPD at 30 °C in a  
198 shaking incubator. SHAM or Pyocyanin was added to wild-type cells to a final  
199 concentration of 0.5 mM or 80µM respectively and cells were returned to the incubator  
200 for a further 30 min. RNA was then extracted using an E.Z.N.A.® Yeast RNA Kit using

201 the manufacturer's instructions, for two biological replicates per group. RNA was sent  
202 to the Centre for Genome Enabled Biology and Medicine (Aberdeen, UK), which  
203 performed preparation of stranded TruSeq mRNA libraries, QC/quantification and  
204 equimolar pooling, and sequencing on an Illumina NextSeq500 with 1x75bp single  
205 reads and average depth of 30M reads per sample. Raw RNAseq data was analysed  
206 using the suite of tools available in the Galaxy platform (Afgan et al., 2016). Briefly,  
207 reads were aligned to Assembly 21 of the *C. albicans* genome (Candida Genome  
208 Database (Skrzypek MS, Binkley J, Binkley G, Miyasato SR, Simison M)) using  
209 HISAT2. Differentially expressed genes between untreated and treated samples were  
210 identified using Cuffdiff v2.1.1 (Schirmer et al., 2011). The p-values generated by  
211 Cuffdiff's statistical algorithm were adjusted using Benjamini-Hochberg correction for  
212 multiple-testing to generate the q-value (allowed false discovery rate of 0.05). A q-  
213 value less than 0.05 was considered statistically significant. The data discussed in this  
214 publication have been deposited in NCBI's Gene Expression Omnibus and are  
215 accessible through GEO Series accession number GSE117717.

216

### 217 **High Resolution whole cell respirometry**

218 Respirometry was carried out in real time using an Oxygraph-2k respirometer  
219 (Oroboros Instruments, Austria) which was calibrated at 30 °C as per the  
220 manufacturer's instructions. Cells from an overnight culture grown in YPD were added  
221 to 3 ml fresh YPD to a final optical density at 600 nm ( $OD_{600}$ ) of 0.2. The cells were  
222 incubated at 30 °C with shaking for 2 h. The cells were then counted and diluted in  
223 YPD to give a final cell concentration of  $1 \times 10^6$  cells/ml, of which 2.5 ml was added to  
224 each chamber in the respirometer. The respiration was allowed to reach routine levels  
225 before the addition of SNP and SHAM, at which time the oxygen concentration was

226 typically 150 ppm. Routine respiration was measured immediately prior to the addition  
227 of inhibitors. The recovery of respiration was measured 20 minutes after the first  
228 addition of inhibitors. SNP and SHAM were added sequentially to 1- and 2 mM final  
229 concentrations. Pyocyanin was added to a final concentration of 80  $\mu$ M. Potassium  
230 cyanide was added where indicated to give a final concentration of 2 mM. Data was  
231 analysed using Datlab 6 software (Oroboros Instruments). Student's t-test was used  
232 to compare groups.

233

### 234 **Western blotting**

235 Cells from an overnight culture in YPD were diluted in YPD to a final OD<sub>600</sub> of 0.2. The  
236 cells were grown for 5 hours at 30 °C with shaking. One millimolar SNP, 1 mM KCN  
237 or 1 mM SHAM were added and samples were taken after 2 h. To examine the  
238 timescale of Aox2 expression in response to 1 mM SNP, samples were taken at 10,  
239 20, 30 and 120 minutes to obtain cell pellets of 30 mg fresh weight. Total protein was  
240 extracted by homogenisation at 4 °C with glass beads in the presence of 125 mM Tris-  
241 HCl, 2% SDS, 2 % glycerol, 0.14 M 2-mercaptoethanol, bromophenol blue buffer at  
242 4 °C. The samples were run on a 5% stacking, 12.5% resolving SDS-polyacrylamide  
243 gel. Proteins were transferred to PVDF membrane using a semi-dry transfer system  
244 (Bio-Rad, Watford, UK). A monoclonal antibody against *Sauromatum guttatum* Aox  
245 which recognises *C. albicans* Aox2 was used for Aox immunoblotting (1:100) (AS10  
246 699, Agrisera, Sweden). Secondary binding of Anti-mouse-HRP antibodies (1:5000)  
247 (Sigma-Aldrich A9917) was detected by ECL and images captured using a Syngene  
248 GBox Chemi XX6 system.

249

## 250 **Hyphal growth assays**

251 Cells from *C. albicans* SC5314, *aox2-aox1Δ* and *aox2-aox1Δ::AOX2* cultures grown  
252 for 16 h in YPD supplemented with 50 ug/ml doxycycline were washed three times in  
253 PBS and used to inoculate RPMI-1640 medium (Sigma-Aldrich, R8755) to a final  
254 OD<sub>600</sub> of 0.1. The cells were incubated in a 180 rpm shaking incubator 37 °C for 16 h.  
255 Calcofluor White (10 µg/ml) was added to aid in visualisation and cells were examined  
256 by microscopy using a DAPI filter. The percentage of cells with germ tubes was  
257 manually determined using ImageJ v1.50 (NIH, Bethesda, MD). A total of least 500  
258 cells were counted for each experiment.

259 Hyphal induction in serum-containing medium was carried out as follows: *C. albicans*  
260 wild-type or *AOX2* overexpression cultures grown for 16 h in YPD supplemented with  
261 50 ug/ml doxycycline were washed three times in PBS and the OD<sub>600</sub> was measured.  
262 Cells were added to DMEM + 10 % FBS (Cat. No.'s 10569010 and 10082147, Gibco,  
263 Thermo Fisher Scientific) with 10 µg/ml Calcofluor White to a final OD<sub>600</sub> of 0.1 and  
264 added to a µ-Slide 8 Well (0.3 ml per well). Following 90 minutes incubation at 37 °C,  
265 5% CO<sub>2</sub>, the cells were examined by microscopy using a DAPI filter. The percentage  
266 of cells with germ tubes was determined manually using ImageJ. A total of least 500  
267 cells were counted for each experiment. Student's t-test was used to compare groups.

268

## 269 **Cell wall perturbing agents susceptibility assay**

270 To assess differences in susceptibilities to cell wall perturbing agents between the  
271 wild-type and *aox2-aox1Δ*, YPD plates were prepared containing 25 µg/ml Calcofluor  
272 White or 50 µg/ml Congo Red. YP-glycerol plates were used to assess sensitivities to  
273 10 µg/ml methylene blue and 1 mM SNP. Cells from an overnight culture in YPD were

274 washed three times in PBS and diluted in PBS to a final OD<sub>600</sub> of 0.2. Cells were  
275 serially diluted (1:10 dilutions) and equal volumes were spotted on the plates using a  
276 replica plating tool. The plates were incubated for 48 h at 30 °C and photographed.  
277 Dectin-1 staining of cells and microscopy was carried out as described in (Duvenage  
278 et al., 2018).

279

### 280 **Phagocytosis assay**

281 J774.1 murine macrophages were maintained in DMEM with 10% FBS, 200 U/ml  
282 penicillin/streptomycin (respectively, Cat No. 10569010, 10082147, 15070063, Gibco,  
283 Thermo Fisher) at 37 °C, humidified 5% CO<sub>2</sub>. Cells were counted and diluted in fresh  
284 medium to give 5 x 10<sup>4</sup> cells in 0.3 ml which was added to the wells of a µ-Slide 8 Well  
285 (ibidi GmbH, Germany). The cells were then incubated overnight. For SHAM pre-  
286 treatment of *C. albicans*, 0.5 mM SHAM was added to log-phase cultures in YPD and  
287 grown for a further 18 h. Cells from an overnight *C. albicans* culture were washed three  
288 times in PBS and counted, then diluted to 1.5 x 10<sup>4</sup> cells in 0.3 ml in macrophage  
289 culture medium with 10 µg/ml Calcofluor White and vortexed briefly. This cell  
290 suspension was then added to macrophages. The cells were then co-incubated for 1h  
291 and examined by microscopy. Uptake of *C. albicans* was manually assessed using  
292 ImageJ. The percentage uptake was determined as the number of internalised  
293 *C. albicans* relative to the total number of *C. albicans* cells. At least 200 *C. albicans*  
294 cells were counted for each experiment. Student's t-test was used to compare groups.

295

### 296 **Zebrafish larva survival assay**

297 *C. albicans* strains were grown overnight in YPD at 30 °C and then washed three times  
298 in PBS, counted and adjusted to give 100 or 500 colony forming units (CFU) in 1 nl

299 and pelleted by centrifugation. Pellets were resuspended in 10%  
300 Polyvinylpyrrolidone (PVP), 0.5% Phenol Red in PBS. Wild-type zebrafish larvae  
301 (*Nacre*) were injected with a total of 100 or 500 CFU using the method described in  
302 (Bojarczuk et al., 2016). Injected animals were maintained in E3 in 96 well plates at  
303 28 °C. Survival was assessed by inspection of heartbeat and motility after 24 and 48  
304 hours. Survival curves were analysed by Log-rank (Mantel-Cox) test using GraphPad  
305 Prism 7.03. Three independent experiments were performed each using 10 zebrafish  
306 larvae per group.

307

### 308 **Murine infection model and assessment of virulence**

309 The virulence of *aox2-aox1*Δ was examined using a murine intravenous challenge  
310 assay. Wild-type (SC5314) and *aox2-aox1*Δ *C. albicans* were incubated overnight in  
311 YPD at 30 °C with shaking. BALB/c female mice (6-8 weeks old, Envigo UK) were  
312 randomly assigned into groups of 6, with group size determined by power analyses  
313 using data previously obtained using this infection model. Mice were acclimatized for  
314 5 days prior to the experiment. Mice were weighed and tail-marked using a surgical  
315 marker pen for identification. Food and water was provided *ad libitum*. *C. albicans* cells  
316 were washed twice with sterile saline and diluted in sterile saline to produce an  
317 inoculum of  $4 \times 10^4$  CFU/g mouse body weight in 100 μl PBS. Inoculum level was  
318 confirmed by viable plate count on Sabouraud Dextrose agar. Mice were weighed and  
319 checked daily until day 3 post-infection when all mice were culled by cervical  
320 dislocation. The kidneys were removed aseptically for fungal burden determination,  
321 with kidneys weighed and homogenised in 0.5 ml sterile saline. Dilutions were plated  
322 on Sabouraud Dextrose agar and incubated overnight at 35 °C. Colonies were counted  
323 and expressed as colony forming units (CFU) per g of kidney. Change in weight of

324 individual mice was calculated as percentage weight change relative to starting weight.

325 An outcome score was calculated based upon kidney burdens and weight loss at time

326 of culling (MacCallum et al., 2010). Student's t-test was used to compare groups.

327

328 **Ethics statement.**

329 Mouse experiments were carried out under licence PPL70/9027 awarded by the UK

330 Home Office to Dr Donna MacCallum at the University of Aberdeen. All experiments

331 conform to the UK Animals (Scientific Procedures) Act (ASPA) 1986 and EU Directive

332 2010/63/EU. Zebrafish work was performed following UK law: Animal (Scientific

333 Procedures) Act 1986, under Project License PPL 40/3574 and P1A4A7A5E. Ethical

334 approval was granted by the University of Sheffield Local Ethical Review Panel.

335

## 336 **Results**

### 337 **AOX is rapidly induced upon ETC inhibition to support respiratory function**

338 Our aim was to investigate the regulation and physiological roles of AOX in  
339 *C. albicans*. To facilitate this we adopted a double deletion strategy to remove  
340 both *AOX* genes (*AOX1* and *AOX2*) and produce a strain devoid of alternative oxidase  
341 activity. The deletion of both *AOX* genes was confirmed by PCR (Supplementary  
342 Material Figure S1A, B) and RT-PCR (Supplementary Material Figure S1C). Next we  
343 sought to identify conditions that could be used to perform experiments under  
344 conditions of AOX inhibition; *AOX2* could be rapidly induced upon application of COX  
345 complex inhibitors, with an increase in *AOX2* mRNA detectable within 15 min of KCN  
346 exposure (Figure 1A). *Aox2* was strongly induced by the Nitric Oxide donor Sodium  
347 Nitroprusside (SNP) and to a similar degree upon cyanide treatment (KCN) treatment  
348 which both target the ETC (Figure 1B). The alternative oxidase inhibitor SHAM, used  
349 in later experiments, did not induce *Aox2* expression (Figure 1B). *Aox2* protein was  
350 detectable within 20 min of induction and increased in level over time (Figure 1C).  
351 *Aox2* was not detectable in untreated cells by western blot.

352

353 In order to study the physiological effects of *Aox* induction whole-cell respirometry was  
354 performed using wild-type and *aox2-aox1Δ* strains. While wild type cells recovered full  
355 respiratory function within approximately 25 min following SNP treatment, cells lacking  
356 *Aox* function failed to do so (Figure 1D). Respiration observed in wild type cells that  
357 had recovered following SNP treatment was insensitive to further SNP addition but  
358 could be fully inhibited by the *Aox* inhibitor SHAM (Figure 1D and 1E). The *aox2-aox1Δ*  
359 mutant was insensitive to further addition of SNP following initial treatment with this



360 inhibitor and was also unaffected by SHAM addition following SNP treatment (Figure  
361 1D and 1E). Similar results were observed when KCN was used instead of SNP  
362 (Supplementary Figure S2). These data are in line with the observed upregulation of  
363 Aox mRNA and protein following ETC inhibitor application and confirm that the  
364 subsequent restoration of respiration is Aox dependent. The importance of Aox  
365 dependent respiration under ETC inhibition is highlighted by our finding that *aox2*-  
366 *aox1* $\Delta$  cells fail to grow on agar plates containing SNP or methylene blue  
367 (Supplementary Figure S1D), a commonly used antifungal agent that uncouples  
368 classical respiration by transferring electrons from the ubiquinone pool directly to  
369 oxygen (Schirmer et al., 2011).

370

371 To allow for the examination of the effects of AOX induction we introduced *AOX2* into  
372 both a wild-type and *aox2-aox1* $\Delta$  background under the control of an inducible  
373 promoter. This approach enabled us to examine the effects of the constitutive  
374 overexpression of Aox2, or Aox2 overexpression in addition to endogenous Aox2 that  
375 could be induced by classical ETC inhibition. Overexpression of Aox2 in the *aox2*-  
376 *aox1* $\Delta$  background reduced the magnitude of respiration inhibition by KCN and the  
377 remaining respiration was sensitive to SHAM, confirming Aox2 activity (Figure 2A and  
378 2B). When Aox2 was overexpressed in the wild-type background, addition of cyanide  
379 did not cause a decrease in respiration (Figure 2C). The decrease in respiration level  
380 following SHAM addition showed that the majority of the respiration was due to  
381 alternative oxidase activity (Figure 2C). These data suggest that the Aox levels  
382 correlate well with protection against agents that inhibit the ETC.

383

384 **The absence of Aox does not affect cell wall integrity or macrophage recognition**

385 Several studies have shown a link between respiration and cell wall integrity in *C.*  
386 *albicans* (Dagley et al., 2011; Khamooshi et al., 2014; She et al., 2013). To determine  
387 whether alternative respiration contributes to cell wall integrity, we examined the  
388 sensitivity of *aox-aox1*Δ to the cell wall damaging agents Calcofluor White and Congo  
389 Red. The growth of *aox2-aox1*Δ cells was similar to the wild-type upon exposure to  
390 these agents (Figure 3A). We also examined surface exposure of chitin and β-glucan  
391 by cell wall staining with wheat-germ agglutinin and dectin-1 but found no significant  
392 difference between wild type and *aox2-aox1*Δ cells (Supplementary Figure S3).

393

394 A difference in recognition and uptake by macrophages may also reflect cell wall  
395 changes as this relies on recognition of surface exposed cell wall PAMPS, especially  
396 β-glucan (Gow et al., 2007). We examined the uptake of *aox2-aox1*Δ and the wild-  
397 type strain that had been grown in the presence of the Aox inhibitor SHAM by murine  
398 macrophages. The percentage uptake by macrophages of *aox2-aox1*Δ or SHAM-  
399 treated wild-type cells was not significantly different to that of the untreated wild-type  
400 strain (Figure 3B and 3C). Overall these data suggest that suppression of alternative  
401 respiration alone, either by chemical means or by deletion of the alternative oxidases,  
402 does not affect cell wall integrity or *C. albicans* immune cell recognition.

403

404 **Alternative respiration has a role *C. albicans* hyphal transition**

405 Mitochondrial activity has been shown to modulate Ras1-Cyr1-PKA pathway (Grahl et  
406 al., 2015) and so may influence yeast-to-hyphae transition in *C. albicans*. In addition,  
407 loss of Complex I activity of the ETC has been linked to a reduction in the ability to

408 activate the hyphal transition program in *C. albicans* (McDonough et al., 2002).  
409 Mitochondrial function is therefore clearly linked to the hyphal transition programme  
410 and we sought to determine whether Aox plays a role in this process. Under conditions  
411 known to activate the hyphal transition programme we found that *aox2-aox1Δ* mutant  
412 cells displayed a defect in germination. After 16 h growth in RPMI at 37 °C significantly  
413 fewer *aox2-aox1Δ* cells had germinated when compared to the wild type strain, and a  
414 high proportion of *aox2-aox1Δ* yeast cells exhibited an aberrant elongated morphology  
415 (Figure 4A, B). This effect could be reversed by re-expression of *AOX2* (Figure 4B).  
416 Further evidence for a direct role of Aox in activating hyphal transition was obtained  
417 by examining the effects of overexpression of *AOX2*. Overexpression of *AOX2* in  
418 DMEM + 10% serum caused a significant increase in the proportion of cells which had  
419 formed germ tubes after 90 min when compared to the control (Figure 4C, D).

420

## 421 **Aox is involved in the regulation of genes required for filamentous growth and** 422 **glucose transport**

423 As we observed that loss of *AOX2* could lead to profound effects under conditions of  
424 normal ETC function we examined the effects of its deletion upon global transcription  
425 during normal growth in YPD at 30 °C. For comparison we also examined the effects  
426 of addition of the Aox inhibitor SHAM to wild type cells. Interestingly the deletion of  
427 *AOX2* alone led to the differential expression of a number of genes under normal  
428 growth conditions (Figure 5A and 5B, Supplementary table S3). A number of genes  
429 affecting filamentous growth were differentially expressed in *aox2Δ* cells when  
430 compared to wild type, supporting our observation that Aox plays a role in hyphal  
431 transition. Genes involved in the repression of filamentous growth or genes which,

432 when deleted, have hyperfilamentous phenotypes, including *CDC7*, *SKO1*, *RFG1*,  
433 *GAL10*, *PDE2* and *FGR22*, were upregulated (Alonso-Monge et al., 2010; Jung et al.,  
434 2005; Kadosh and Johnson, 2001; Lai et al., 2016; Singh et al., 2007; Uhl et al., 2003),  
435 while *DFG5*, encoding a GPI-anchored cell wall protein which promotes hyphal growth  
436 (Spreghini et al., 2003), was downregulated.

437

438 Several members of the high-affinity glucose transporter gene family (Fan et al., 2002)  
439 were upregulated upon *AOX2* deletion (*HGT1*, -6, -8, 10, 19), suggesting increased  
440 glucose assimilation. This may be accompanied by an increase in glycolysis as the  
441 glucokinase gene *GLK1* was also upregulated. Interestingly, all three genes involved  
442 in the degradation of galactose (Leloir pathway) were upregulated (*GAL10*, *GAL1*,  
443 *GAL7*). *GAL10* has been shown to have a role in regulating morphogenesis even in  
444 the absence of galactose, and the *GAL10* null mutant is hyperfilamentous (Singh et  
445 al., 2007). Upregulated genes associated with increased resistance to oxidative stress  
446 were also upregulated including *GLX3*, *GAL10* and *HSP21* (Figure 5B).

447

448 SHAM treatment induced more gene expression changes than deletion of *AOX2*,  
449 suggesting additional off-target effects (Figure 5A, Supplementary Table S4).  
450 Upregulated transcription factors common to both *aox2Δ* and SHAM-treated groups  
451 included *CZF1*, *SFL2*, *SKO1* and *RFG1* which all regulate aspects of hyphal growth.  
452 *MDR1*, encoding the multidrug efflux pump, was downregulated approximately twofold  
453 in both *aox2Δ* and SHAM-treated groups, suggesting alternative respiration might play  
454 an important role in the response to antifungals. Transcripts of heat-shock factors  
455 Hsp21, -70, -104, which have been shown to have roles in virulence and stress

456 responses other than heat-shock (Fiori et al., 2012; Mayer et al., 2012), were also  
457 upregulated in both groups.

458

459 A number of genes with functions in mannan biosynthesis and organisation were  
460 upregulated in SHAM treated cells (Figure 4C). Genes involved in  $\beta$ -glucan  
461 biosynthesis (*GSC1*, *KRE1*) were also upregulated. In contrast, a number of genes  
462 involved in chitin synthesis and degradation were downregulated. These  
463 transcriptional changes in cell wall genes observed with SHAM treatment could lead  
464 to a change in cell wall organisation. By comparison, there were fewer differentially  
465 expressed cell wall genes in the *aox2* $\Delta$  group, suggesting that off-target effects of  
466 SHAM, rather than inhibition of alternative respiration, may influence expression of cell  
467 wall genes.

468

469 *TRY6*, one of the major transcriptional activators of glycolysis genes, was the most  
470 highly upregulated transcription factor in both groups. In the SHAM-treated group,  
471 several glycolysis genes were upregulated (*CDC19*, *PGK1*, *GPM1*) as well as the  
472 glyoxylate cycle gene (*MLS1*), while some TCA cycle genes were downregulated  
473 (*PYC2*, *ACO1*). In the SHAM treated group, a number of genes involved in the  
474 oxidative stress response were differentially expressed, including downregulation of  
475 *TSA1B*, *SOD1*, *SOD4* and *SOD5*. On the other hand, a number of oxidative stress  
476 genes were upregulated, including *CAT1* and *GPX3*. Differentially expressed genes  
477 linked to oxidative stress resistance in *aox2* $\Delta$  (*GLX3*, *GAL10* and *HSP21*) may not  
478 necessarily be indicative of oxidative stress as their roles are indirect and they may

479 have served other functions, in contrast to peroxidase and catalase genes in the  
480 SHAM group.

481

482 Analysis of the differentially expressed gene list from the SHAM treated group using  
483 PathoYeasttract (Monteiro et al., 2017) showed that the transcription factor Ndt80  
484 showed the most number of regulatory associations with the genes in the list based  
485 on documented DNA binding and expression evidence. *NDT80* was itself upregulated  
486 2.2-fold. This transcription factor has a role in hyphal growth and biofilm formation (Lin  
487 et al., 2013; Sellam et al., 2010) and in sterol metabolism and drug resistance (Sellam  
488 et al., 2009). Other regulators that featured in this transcription factor ranking analysis  
489 include Tye7, which regulates glycolysis and carbohydrate metabolism, and Mcm1  
490 and Sko1, which control hyphal growth (Alonso-Monge et al., 2010; Rottmann et al.,  
491 2003).

492

493 Similar to the *aox2Δ* results, a number of genes which negatively regulate hyphal  
494 growth were upregulated in the SHAM group (*DOA1*, *CLN3*, *PDE2* and *SFL1*) (figure  
495 4C) (Bauer and Wendland, 2007; Chapa et al., 2005; Jung et al., 2005; Kunze et al.,  
496 2007). These data suggest that SHAM treatment may suppress the yeast-to-hypha  
497 transition. In support of this we observed that SHAM was able to prevent hyphal  
498 transition on RPMI agar, a strong inducer of hyphal induction (Supplementary Figure  
499 4). A similar effect of SHAM has been reported in other studies (Huh and Kang, 2001;  
500 Konno et al., 2006).

501

502 **Loss of Aox reduces virulence in zebrafish but not in the mouse model of**  
503 **systemic candidiasis**

504 To examine the effect of the absence of alternative respiration on virulence, we  
505 employed the zebrafish model of systemic candidiasis. Zebrafish larvae were injected  
506 with 100 cfu or 500 cfu *C. albicans*. The fish were then kept at 28 °C and survival was  
507 assessed by inspection of heartbeat and motility after 24 and 48 hours. Fish in the  
508 *aox2-aox1Δ* group showed a higher survival rate than the wild-type strain (Figure 6A  
509 and 6B) but were not avirulent as all fish died after 48 h when 500 cfu *C. albicans* were  
510 injected (Figure 6B). A lower mortality rate was observed for both *aox2-aox1Δ* and  
511 *aox2Δ* deletion strains when compared to the wild-type after 24 hours (Figure 6A).

512

513 Based on the results of the zebrafish survival studies, we wished to determine the  
514 virulence of the *aox2-aox1Δ* mutant in the mouse model of systemic candidiasis. Mice  
515 were injected with *aox2-aox1Δ* via the tail vein and weight loss was monitored over  
516 the course of infection. There was no significant difference in weight loss between  
517 groups injected with *aox2-aox1Δ* and the wild-type strain (Figure 6C). The fungal  
518 burden in the kidneys was slightly higher in the *aox2-aox1Δ* group but this was not  
519 statistically significant (Figure 6C). The combination of these factors resulted in no  
520 significant difference in outcome score (MacCallum et al., 2010) between the *aox2-*  
521 *aox1Δ* and wild type groups. Therefore, the alternative pathway seems to be  
522 dispensable for virulence in the mouse model under the conditions tested.

523

524 **Pyocyanin inhibits alternative respiration and is synergistic with cyanide to**  
525 **inhibit respiration in *C. albicans***

526 Our data suggests that Aox may be important for cellular responses to respiratory  
527 challenge. It may be the case, therefore, that Aox function is important in the  
528 interaction between *C. albicans* and microbes that secrete factors that target  
529 respiratory machinery. An example of such an interaction lies between *C. albicans* and  
530 the pathogen *P. aeruginosa*, which produces cyanide under conditions of hypoxia and  
531 at high levels within cystic fibrosis patients (Cody et al., 2009). Alternative respiration  
532 may be required in this case as both species often occupy the same niche in cystic  
533 fibrosis patients (Chen et al., 2014). *P. aeruginosa* cells also produce molecules of the  
534 phenazine class and one of these, Pyocyanin (PYO), been shown to inhibit *C. albicans*  
535 filamentation (Morales et al., 2013).

536

537 We hypothesised that PYO might interfere with alternative respiration in synergy with  
538 cyanide to inhibit *C. albicans* respiration and halt growth of the yeast. We therefore  
539 tested the effects of PYO on alternative respiration following exposure to cyanide  
540 (Figure 7A and B). Two experiments were conducted in parallel: in the first, KCN was  
541 added to induce alternative respiration, at which point PYO was added to examine its  
542 effects on alternative pathway inhibition (Figure 7A). In the second experiment, PYO  
543 was added first, followed by KCN, to determine whether PYO alone affected  
544 respiration and also examine its effects on Aox2 induction (Figure 7B). The addition of  
545 PYO did not have any effect on routine respiration level, but significantly reduced the  
546 induction of Aox activity (Figure 7B). Furthermore, PYO was able to inhibit alternative  
547 respiration once it was induced by KCN (Figure 7A and 7C). These results show that  
548 PYO can act to inhibit of alternative respiration and also suggest that it may act in  
549 combination with cyanide to inhibit respiration in *C. albicans*.



550

551 We next performed RNAseq to investigate the transcriptional changes made in *C.*  
552 *albicans* in response to PYO treatment. A small number of changes were observed  
553 upon a 30 min treatment with PYO. Genes involved in the glutathione- and thioredoxin  
554 antioxidant systems, as well as other oxidative stress response genes were  
555 upregulated, suggesting that PYO treatment causes oxidative stress in *C. albicans*  
556 (Figure 7D). Downregulated genes in PYO-treated cells include those involved in  
557 glycine catabolism (*GCV1* and *GCV2*), intracellular acetyl-CoA transport (*CAT2*), and  
558 utilisation of hemin iron (*HMX1*). Genes that were significantly differentially expressed  
559 in PYO treated cells are listed in Supplementary Table S5.

560

561 **Discussion**

562 Although Aox function has been well studied in some filamentous fungi (Magnani et  
563 al., 2007; Nargang et al., 2012; Scheckhuber et al., 2011), the roles, regulation and  
564 contribution of alternative respiration in yeasts remains poorly understood. We present  
565 evidence that Aox has a role in protection of respiratory function, morphogenesis and  
566 in stress responses that may facilitate *C. albicans* in its capacity as both a commensal  
567 organism and as an opportunistic pathogen.

568

569 *C. albicans* Aox function would appear to be particularly important upon exposure to  
570 chemicals that disrupt ETC function. It may be the case that this reflects regular  
571 exposure to such compounds via interactions with host cells and other microbes. An  
572 example of such a compound is nitric oxide (NO). The inducible nitric oxide synthase  
573 (iNOS or NOS2) is the major source of NO that is generated by phagocytes as an  
574 antimicrobial defence. Interestingly data from *NOS2* knockout mice suggests that this  
575 enzyme is dispensible for clearance of oral candidiasis and for killing by macrophages  
576 (Farah et al., 2009). In addition nitrosative stress response genes were not found to  
577 be upregulated in *C. albicans* isolated from infected mice (Thewes et al., 2007).  
578 Deletion of *YHB1*, a nitric oxide dioxygenase involved in NO detoxification, from *C.*  
579 *albicans* led to a reduction in virulence in a mouse model but this loss did not correlate  
580 with *NOS2* function, also suggesting that NO production does not have a major effect  
581 on virulence in this model of candidiasis (Hromatka et al., 2005). In contrast, it was  
582 shown that *C. albicans* secretes factors specifically to inhibit NO production by immune  
583 cells (Collette et al., 2014). Why *C. albicans* might suppress NO production when it  
584 does not seem to be an important factor in determining virulence in a bloodstream

585 infection is unclear, and highlights a lack of understanding of the precise roles of host-  
586 derived NO against *C. albicans*. The virulence of cells devoid of AOX function was not  
587 affected in a mouse infection model in our studies, also suggesting that the production  
588 of host NO is not a determinant of virulence in this model, or at least that the purpose  
589 of NO is not to inhibit *C. albicans* respiration. One possibility is that instead of inhibiting  
590 respiration, the fungicidal effects of NO may be derived from the generation of reactive  
591 nitrogen species such as peroxynitrite which forms when NO reacts with superoxide.  
592 NO-producing macrophages kill *C. albicans* more effectively when stimulated to  
593 produce higher levels of superoxide, suggesting that NO alone is not candidacidal  
594 (Vazquez-Torres et al., 1996).

595

596 Nevertheless our data clearly demonstrates that NO exposure leads to the inhibition  
597 of ETC function and to the upregulation of Aox which in turn facilitates continued  
598 respiration. One possibility is that NO exposure within the host elicits an Aox  
599 dependent stress response that primes *C. albicans* cells to initiate hyphal growth. In  
600 support of this idea, the contribution of the alternative pathway to total respiration in  
601 hyphal cells was shown to be significantly higher than in yeast (Guedouari et al., 2014).  
602 In addition, an inducer of Aox activity, guanosine-5'-monophosphate (GMP) (Milani et  
603 al., 2001), was shown to trigger filamentation in *C. albicans* under conditions of pH 4  
604 in RPMI medium, in which hyphal growth is normally suppressed (Konno et al., 2006).  
605 It may be the case that Aox support of respiration allows TCA cycle to function under  
606 conditions of ETC inhibition and that this is important in the support of hyphal switching  
607 or hyphal growth. Communication between respiration and the TCA cycle seems to be  
608 a crucial aspect of hyphal growth, as inhibition of complex II to transfer electrons to  
609 ubiquinone using Thenoyltrifluoroacetone (TTFA) was shown to completely block

610 filamentation (Watanabe et al., 2006). Further support comes from our finding that NO  
611 induced Aox expression, and indeed the overexpression of Aox in the absence of NO,  
612 promotes filamentation (Duvenage et al., 2018). The RNAseq data presented here  
613 also supports the hypothesis that AOX has a role in hyphal switching, as several genes  
614 involved in its regulation were differentially expressed in both the *aox2Δ* and SHAM  
615 treated groups. For example, the transcription factor *SKO1*, upregulated in both  
616 groups, represses the hyphal transition by controlling the expression of hyphal-specific  
617 genes such as *HWP1* and *ECE1* (Alonso-Monge et al., 2010).

618

619 As Aox appears to play an important role in mediating filamentation we would expect  
620 that the loss of Aox, or indeed its inhibition, would have a marked effect on *C. albicans*  
621 virulence. Our experimental approach tested this hypothesis in both zebrafish and  
622 mouse models of infection. The zebrafish larva survival model focuses on the innate  
623 immune response to *C. albicans*, as adaptive immunity has not developed at the time  
624 of infection. In this case infection with either *aox2Δ* or *aox2-aox1Δ* mutant strains  
625 showed attenuated virulence. However, the fact that no larvae survived longer than  
626 48 h – in the case where a higher number of CFUs were injected – showed that the  
627 loss of alternative respiration merely slowed the progress of the infection. This could  
628 be due to a slower emergence of hyphae at the incubation temperature of 28 °C. A  
629 correlation between filamentation and increased virulence in this model has been  
630 noted previously (Mallick et al., 2016).

631

632 Another reason for the maintenance of Aox function may reside with interactions with  
633 other microbes that secrete molecules that target classical respiration. Such

634 interactions may form part of symbiotic or competitive interactions between resident  
635 or invading microorganisms. One such example is the interaction between *C. albicans*  
636 and *P. aeruginosa*, which are frequently co-isolated from the cystic fibrosis lung. In  
637 cystic fibrosis *P. aeruginosa* is known to secrete cyanide, as well a class of molecules  
638 known as phenazines – including pyocyanin (PYO) – which inhibits filamentation in  
639 *C. albicans* (Morales et al., 2013). We chose to examine the effect of the phenazine  
640 pyocyanin (PYO) on respiration in *C. albicans* based on the observed sensitivity of the  
641 *aox2-aox1Δ* mutant to its thioanalogue, methylene blue (MB). Although both PYO and  
642 MB have pleiotropic effects, current evidence agrees that one of their targets is the  
643 ETC (Kasozi et al., 2011; Schirmer et al., 2011). In our RNAseq analysis of PYO  
644 treated cells the most noticeable trend was an oxidative stress response, with  
645 upregulation of genes in the glutathione and thioredoxin antioxidant systems.  
646 Induction of oxidative stress and disruption of the glutathione redox cycle by pyocyanin  
647 has previously been reported in human endothelial cells (Muller, 2002). As one of the  
648 targets of PYO is mitochondria, it is also possible that mitochondrial dysfunction could  
649 have contributed to increased oxidative stress.

650

651 The production of cyanide by *P. aeruginosa* may be another strategy to inhibit growth  
652 of competing microorganisms such as *C. albicans*, however alternative respiration  
653 allows for normal growth in the presence of cyanide. Our data suggests that  
654 mitochondria respiring via the alternative pathway are more susceptible to the effects  
655 of PYO. The production of a second factor, PYO, by *P. aeruginosa* to counteract  
656 alternative respiration in synergy with cyanide, highlights the relevance of *C. albicans*  
657 Aox function in microbial interactions where electron transport chain inhibition can  
658 occur. The function of Aox in resistance to respiratory stress is also likely one of its

659 physiological functions in its co-existence with competing microbes such as  
660 *P. aeruginosa*. Whether elevated Aox activity influences filamentation in these  
661 situations should be considered in future work.

662

663 In summary we find that Aox plays an important role in the responses of *C. albicans*  
664 to ETC inhibition. The induction of Aox in support of alternative respiration is clearly  
665 essential for growth and survival as *C. albicans* depends upon mitochondrial function  
666 for growth. Our findings suggest that, as has been found in other eukaryotic organisms  
667 that maintain Aox function, alternative respiration is likely to facilitate survival and  
668 adaptability within specialised niche environments that commonly damage ETC  
669 function.

670

671

672 **References**

- 673 **Afgan, E., Baker, D., van den Beek, M., Blankenberg, D., Bouvier, D., Čech, M.,**  
674 **Chilton, J., Clements, D., Coraor, N., Eberhard, C., et al. (2016).** The Galaxy  
675 platform for accessible, reproducible and collaborative biomedical analyses:  
676 2016 update. *Nucleic Acids Res.* **44**, W3–W10.
- 677 **Akhter, S., McDade, H. C., Gorlach, J. M., Heinrich, G., Cox, G. M. and Perfect,**  
678 **J. R. (2003).** Role of alternative oxidase gene in pathogenesis of *Cryptococcus*  
679 *neoformans*. *Infect. Immun.* **71**, 5794–802.
- 680 **Alonso-Monge, R., Román, E., Arana, D. M., Prieto, D., Urrialde, V., Nombela, C.**  
681 **and Pla, J. (2010).** The Sko1 protein represses the yeast-to-hypha transition  
682 and regulates the oxidative stress response in *Candida albicans*. *Fungal Genet.*  
683 *Biol.* **47**, 587–601.
- 684 **Balcke, G. U., Kolle, S. N., Kamp, H., Bethan, B., Looser, R., Wagner, S.,**  
685 **Landsiedel, R. and van Ravenzwaay, B. (2011).** Linking energy metabolism to  
686 dysfunctions in mitochondrial respiration - A metabolomics in vitro approach.  
687 *Toxicol. Lett.* **203**, 200–209.
- 688 **Bauer, J. and Wendland, J. (2007).** *Candida albicans* Sfl1 suppresses flocculation  
689 and filamentation. *Eukaryot. Cell* **6**, 1736–1744.
- 690 **Bojarczuk, A., Miller, K. A., Hotham, R., Lewis, A., Ogryzko, N. V., Kamuyango,**  
691 **A. A., Frost, H., Gibson, R. H., Stillman, E., May, R. C., et al. (2016).**  
692 *Cryptococcus neoformans* Intracellular Proliferation and Capsule Size  
693 Determines Early Macrophage Control of Infection. *Sci. Rep.* **6**, 21489.
- 694 **Brohn, F. H. and Clarkson Jr., A. B. (1978).** Quantitative effects of

695 salicylhydroxamic acid and glycerol on *Trypanosoma brucei* glycolysis in vitro  
696 and in vivo. *Acta Trop* **35**, 23–33.

697 **Chapa, B., Bates, S. and Sudbery, P.** (2005). The G 1 Cyclin Cln3 Regulates  
698 Morphogenesis in *Candida albicans*. **4**, 1–6.

699 **Chen, A. I., Dolben, E. F., Okegbe, C., Harty, C. E., Golub, Y., Thao, S., Ha, D. G.,**  
700 **Willger, S. D., O'Toole, G. A., Harwood, C. S., et al.** (2014). *Candida albicans*  
701 Ethanol Stimulates *Pseudomonas aeruginosa* WspR-Controlled Biofilm  
702 Formation as Part of a Cyclic Relationship Involving Phenazines. *PLoS Pathog.*  
703 **10**,.

704 **Chotirmall, S. H., O'Donoghue, E., Bennett, K., Gunaratnam, C., O'Neill, S. J.**  
705 **and McElvaney, N. G.** (2010). Sputum *Candida albicans* presages FEV(1)  
706 decline and hospital-treated exacerbations in cystic fibrosis. *Chest* **138**, 1186–  
707 1195.

708 **Cody, W. L., Pritchett, C. L., Jones, A. K., Carterson, A. J., Jackson, D., Frisk,**  
709 **A., Wolfgang, M. C. and Schurr, M. J.** (2009). *Pseudomonas aeruginosa* AlgR  
710 controls cyanide production in an AlgZ-dependent manner. *J. Bacteriol.* **191**,  
711 2993–3002.

712 **Collette, J. R., Zhou, H. and Lorenz, M. C.** (2014). *Candida albicans* suppresses  
713 nitric oxide generation from macrophages via a secreted molecule. *PLoS One*  
714 **9**,.

715 **Dagley, M. J., Gentle, I. E., Beilharz, T. H., Pettolino, F. a, Djordjevic, J. T., Lo, T.**  
716 **L., Uwamahoro, N., Rupasinghe, T., Tull, D. L., McConville, M., et al.** (2011).  
717 Cell wall integrity is linked to mitochondria and phospholipid homeostasis in  
718 *Candida albicans* through the activity of the post-transcriptional regulator Ccr4-



- 719 Pop2. *Mol. Microbiol.* **79**, 968–989.
- 720 **Duvenage, L., Walker, L. A., Bojarczuk, A., Johnston, S. A., MacCallum, D. M.,**  
721 **Munro, C. A. and Gourlay, C.** (2018). Inhibition of classical and alternative  
722 modes of respiration in *C. albicans* leads to cell wall remodelling and increased  
723 macrophage recognition. *bioRxiv* (pre-print).
- 724 **Edmond, M. B., Wallace, S. E., McClish, D. K., Pfaller, M. A., Jones, R. N. and**  
725 **Wenzel, R. P.** (1999). Nosocomial bloodstream infections in United States  
726 hospitals: a three-year analysis. *Clin. Infect. Dis.* **29**, 239–244.
- 727 **Ene, I. V., Adya, A. K., Wehmeier, S., Brand, A. C., Maccallum, D. M., Gow, N. A.**  
728 **R. and Brown, A. J. P.** (2012). Host carbon sources modulate cell wall  
729 architecture, drug resistance and virulence in a fungal pathogen. *Cell. Microbiol.*  
730 **14**, 1319–1335.
- 731 **Fan, J., Chaturvedi, V. and Shen, S.-H.** (2002). Identification and Phylogenetic  
732 Analysis of a Glucose Transporter Gene Family from the Human Pathogenic  
733 Yeast *Candida albicans*. *J. Mol. Evol.* **55**, 336–346.
- 734 **Farah, C. S., Saunus, J. M., Hu, Y., Kazoullis, A. and Ashman, R. B.** (2009).  
735 Gene targeting demonstrates that inducible nitric oxide synthase is not essential  
736 for resistance to oral candidiasis in mice, or for killing of *Candida albicans* by  
737 macrophages in vitro. *Oral Microbiol. Immunol.* **24**, 83–88.
- 738 **Fernández-Ortuño, D., Torés, J. A., De Vicente, A. and Pérez-García, A.** (2008).  
739 Mechanisms of resistance to QoI fungicides in phytopathogenic fungi. *Int.*  
740 *Microbiol.* **11**, 1–9.
- 741 **Fiori, A., Kucharíková, S., Govaert, G., Cammue, B. P. A., Thevissen, K. and**

- 742 **Van Dijck, P.** (2012). The heat-induced molecular disaggregase Hsp104 of  
743 *Candida albicans* plays a role in biofilm formation and pathogenicity in a worm  
744 infection model. *Eukaryot. Cell* **11**, 1012–1020.
- 745 **Fisher, N. and Meunier, B.** (2008). Molecular basis of resistance to cytochrome bc1  
746 inhibitors. *FEMS Yeast Res.* **8**, 183–92.
- 747 **Gow, N. A. R., Netea, M. G., Munro, C. A., Ferwerda, G., Bates, S., Mora-Montes,**  
748 **H. M., Walker, L., Jansen, T., Jacobs, L., Tsoni, V., et al.** (2007). Immune  
749 recognition of *Candida albicans* beta-glucan by dectin-1. *J. Infect. Dis.* **196**,  
750 1565–1571.
- 751 **Grahl, N., Dinamarco, T. M., Willger, S. D., Goldman, G. H. and Cramer, R. A.**  
752 (2012). *Aspergillus fumigatus* mitochondrial electron transport chain mediates  
753 oxidative stress homeostasis, hypoxia responses and fungal pathogenesis. *Mol.*  
754 *Microbiol.* **84**, 383–399.
- 755 **Grahl, N., Demers, E. G., Lindsay, A. K., Harty, C. E., Willger, S. D., Piispanen,**  
756 **A. E. and Hogan, D. a.** (2015). Mitochondrial Activity and Cyr1 Are Key  
757 Regulators of Ras1 Activation of *C. albicans* Virulence Pathways. *PLOS Pathog.*  
758 **11**, e1005133.
- 759 **Guedouari, H., Gergondey, R., Bourdais, A., Vanparis, O., Bulteau, A. L.,**  
760 **Camadro, J. M. and Auchère, F.** (2014). Changes in glutathione-dependent  
761 redox status and mitochondrial energetic strategies are part of the adaptive  
762 response during the filamentation process in *Candida albicans*. *Biochim.*  
763 *Biophys. Acta* **1842**, 1855–1869.
- 764 **Helmerhorst, E. J., Murphy, M. P., Troxler, R. F. and Oppenheim, F. G.** (2002).  
765 Characterization of the mitochondrial respiratory pathways in *Candida albicans*.

- 766 *Biochim. Biophys. Acta* **1556**, 73–80.
- 767 **Helmerhorst, E. J., Stan, M., Murphy, M. P., Sherman, F. and Oppenheim, F. G.**  
768 (2005). The concomitant expression and availability of conventional and  
769 alternative, cyanide-insensitive, respiratory pathways in *Candida albicans*.  
770 *Mitochondrion* **5**, 200–211.
- 771 **Hernández, O., Araque, P., Tamayo, D., Restrepo, A., Herrera, S., Mcewen, J.**  
772 **G., Pelaez, C. and Almeida, A. J.** (2015). Alternative oxidase plays an  
773 important role in *Paracoccidioides brasiliensis* cellular homeostasis and  
774 morphological transition. *Med. Mycol.* **53**, 205–14.
- 775 **Hernández Ruiz, O., Gonzalez, A., Almeida, A. J., Tamayo, D., Garcia, A. M.,**  
776 **Restrepo, A. and McEwen, J. G.** (2011). Alternative Oxidase Mediates  
777 Pathogen Resistance in *Paracoccidioides brasiliensis* Infection. *PLoS Negl.*  
778 *Trop. Dis.* **5**, e1353.
- 779 **Hromatka, B. S., Noble, S. M. and Johnson, A. D.** (2005). Transcriptional  
780 response of *Candida albicans* to nitric oxide and the role of the YHB1 gene in  
781 nitrosative stress and virulence. *Mol. Biol. Cell* **16**, 4814–26.
- 782 **Huh, W. K. and Kang, S. O.** (1999). Molecular cloning and functional expression of  
783 alternative oxidase from *Candida albicans*. *J. Bacteriol.* **181**, 4098–102.
- 784 **Huh, W. K. and Kang, S. O.** (2001). Characterization of the gene family encoding  
785 alternative oxidase from *Candida albicans*. *Biochem. J.* **356**, 595–604.
- 786 **Ishii, H., Fontaine, J., Chung, W. H., Kansako, M., Nishimura, K., Takahashi, K.**  
787 **and Oshima, M.** (2009). Characterisation of Qol-resistant field isolates of  
788 *Botrytis cinerea* from citrus and strawberry. *Pest Manag. Sci.* **65**, 916–922.

- 789 **Juárez, O., Guerra, G., Velázquez, I., Flores-Herrera, O., Rivera-Pérez, R. E. and**  
790 **Pardo, J. P.** (2006). The physiologic role of alternative oxidase in *Ustilago*  
791 *maydis*. *FEBS J.* **273**, 4603–4615.
- 792 **Jung, W. H., Warn, P., Ragni, E., Popolo, L., Nunn, C. D., Turner, M. P. and**  
793 **Stateva, L.** (2005). Deletion of PDE2, and gene encoding the high-affinity cAMP  
794 phosphodiesterase, results in changes of the cell wall and membrane in  
795 *Candida albicans*. *Yeast* **22**, 285–294.
- 796 **Kadosh, D. and Johnson, A. D.** (2001). Rfg1, a protein related to the  
797 *Saccharomyces cerevisiae* hypoxic regulator Rox1, controls filamentous growth  
798 and virulence in *Candida albicans*. *Mol. Cell. Biol.* **21**, 2496–505.
- 799 **Kasozi, D. M., Gromer, S., Adler, H., Zocher, K., Rahlfs, S., Wittlin, S., Fritz-**  
800 **Wolf, K., Schirmer, R. H., Becker, K., Dm, K., et al.** (2011). The bacterial  
801 redox signalling pyocyanin as an antiplasmodial agent: comparisons with its  
802 thioanalog methylene blue. *Redox Rep.* **16**, 154–165.
- 803 **Khamooshi, K., Sikorski, P., Sun, N., Calderone, R. and Li, D.** (2014). The Rbf1,  
804 Hfl1 and Dbp4 of *Candida albicans* regulate common as well as transcription  
805 factor-specific mitochondrial and other cell activities. *BMC Genomics* **15**,
- 806 **Konno, N., Ishii, M., Nagai, A., Watanabe, T., Ogasawara, A., Mikami, T. and**  
807 **Matsumoto, T.** (2006). Mechanism of *Candida albicans* transformation in  
808 response to changes of pH. *Biol. Pharm. Bull.* **29**, 923–6.
- 809 **Kunze, D., MacCallum, D., Odds, F. C. and Hube, B.** (2007). Multiple functions of  
810 DOA1 in *Candida albicans*. *Microbiology* **153**, 1026–1041.
- 811 **Lai, W. C., Chang, T. W., Wu, C. H., Yang, S. Y., Lee, T. L., Li, W. C., Chien, T.,**

- 812 **Cheng, Y. C. and Shieh, J. C.** (2016). *Candida albicans* Dbf4-dependent Cdc7  
813 kinase plays a novel role in the inhibition of hyphal development. *Sci. Rep.* **6**, 1–  
814 13.
- 815 **Lenney, W. and Gilchrist, F. J.** (2011). *Pseudomonas aeruginosa* and cyanide  
816 production. *Eur. Respir. J.* **37**, 482–483.
- 817 **Lin, C. H., Kabrawala, S., Fox, E. P., Nobile, C. J., Johnson, A. D. and Bennett,**  
818 **R. J.** (2013). Genetic Control of Conventional and Pheromone-Stimulated  
819 Biofilm Formation in *Candida albicans*. *PLoS Pathog.* **9**,.
- 820 **MacCallum, D. M., Coste, A., Ischer, F., Jacobsen, M. D., Odds, F. C. and**  
821 **Sanglard, D.** (2010). Genetic dissection of azole resistance mechanisms in  
822 *Candida albicans* and their validation in a mouse model of disseminated  
823 infection. *Antimicrob. Agents Chemother.* **54**, 1476–1483.
- 824 **Magnani, T., Soriani, F. M., Martins, V. P., Nascimento, a M., Tudella, V. G.,**  
825 **Curti, C. and Uyemura, S. a** (2007). Cloning and functional expression of the  
826 mitochondrial alternative oxidase of *Aspergillus fumigatus* and its induction by  
827 oxidative stress. *FEMS Microbiol. Lett.* **271**, 230–8.
- 828 **Magnani, T., Soriani, F. M., Martins, V. D. P., Policarpo, A. C. D. F., Sorgi, C. A.,**  
829 **Faccioli, L. H., Curti, C. and Uyemura, S. A.** (2008). Silencing of mitochondrial  
830 alternative oxidase gene of *Aspergillus fumigatus* enhances reactive oxygen  
831 species production and killing of the fungus by macrophages. *J. Bioenerg.*  
832 *Biomembr.* **40**, 631–636.
- 833 **Mallick, E. M., Bergeron, A. C., Jones, S. K., Newman, Z. R., Brothers, K. M.,**  
834 **Creton, R., Wheeler, R. T. and Bennett, R. J.** (2016). Phenotypic plasticity  
835 regulates *Candida albicans* interactions and virulence in the vertebrate host.

836 *Front. Microbiol.* **7**, 1–18.

837 **Mayer, F. L., Wilson, D., Jacobsen, I. D., Miramón, P., Slesiona, S., Bohovych, I.**

838 **M., Brown, A. J. P. and Hube, B.** (2012). Small but crucial: The novel small

839 heat shock protein Hsp21 mediates stress adaptation and virulence in *Candida*

840 *albicans*. *PLoS One* **7**,

841 **McDonough, J. A., Bhattacharjee, V., Sadlon, T. and Hostetter, M. K.** (2002).

842 Involvement of *Candida albicans* NADH dehydrogenase complex I in

843 filamentation. *Fungal Genet. Biol.* **36**, 117–27.

844 **Menzies, S. K., Tulloch, L. B., Florence, G. J. and Smith, T. K.** (2018). The

845 trypanosome alternative oxidase: a potential drug target? *Parasitology* **145**,

846 175–183.

847 **Miguez, M., Reeve, C., Wood, P. M. and Hollomon, D. W.** (2004). Alternative

848 oxidase reduces the sensitivity of *Mycosphaerella graminicola* to QOI

849 fungicides. *Pest Manag. Sci.* **60**, 3–7.

850 **Milani, G., Jarmuszkiewicz, W., Sluse-Goffart, C. M., Schreiber, A. Z., Vercesi,**

851 **A. E. and Sluse, F. E.** (2001). Respiratory chain network in mitochondria of

852 *Candida parapsilosis*: ADP/O appraisal of the multiple electron pathways. *FEBS*

853 *Lett.* **508**, 231–235.

854 **Miyata, N., Watanabe, Y., Tamura, Y., Endo, T. and Kuge, O.** (2016).

855 Phosphatidylserine transport by Ups2-Mdm35 in respiration-active mitochondria.

856 *J. Cell Biol.* **214**, 77–88.

857 **Monteiro, P. T., Pais, P., Costa, C., Manna, S., Sa-Correia, I. and Teixeira, M. C.**

858 (2017). The PathoYeast database: An information system for the analysis of

- 859 gene and genomic transcription regulation in pathogenic yeasts. *Nucleic Acids*  
860 *Res.* **45**, D597–D603.
- 861 **Morales, D. K., Grahl, N., Okegbe, C., Dietrich, L. E. P., Jacobs, N. J. and**  
862 **Hogan, D. A.** (2013). Control of *Candida albicans* metabolism and biofilm  
863 formation by *Pseudomonas aeruginosa* phenazines. *MBio* **4**, 1–9.
- 864 **Muller, M.** (2002). Pyocyanin induces oxidative stress in human endothelial cells and  
865 modulates the glutathione redox cycle. *Free Radic Biol Med* **33**, 1527–1533.
- 866 **Murphy, A. D. and Lang-unnasch, N.** (1999). Alternative Oxidase Inhibitors  
867 Potentiate the Activity of Atovaquone against *Plasmodium falciparum*.  
868 *Antimicrob. Agents Chemother.* **43**, 651–4.
- 869 **Nargang, F. E., Adames, K., Rüb, C., Cheung, S., Easton, N., Nargang, C. E. and**  
870 **Chae, M. S.** (2012). Identification of genes required for alternative oxidase  
871 production in the *Neurospora crassa* gene knockout library. *G3 (Bethesda)*. **2**,  
872 1345–56.
- 873 **Noble, S. M. and Johnson, A. D.** (2005). Strains and strategies for large-scale gene  
874 deletion studies of the diploid human fungal pathogen *Candida albicans*.  
875 *Eukaryot. Cell* **4**, 298–309.
- 876 **Park, Y., Park, Y., Morschhauser, J. and Morschhauser, J.** (2005). Tetracycline-  
877 Inducible Gene Expression and Gene Deletion in *Candida albicans*.  
878 *Microbiology* **4**, 1328–1342.
- 879 **Rogov, A. G. and Zvyagilskaya, R. A.** (2015). Physiological Role of Alternative  
880 Oxidase (from Yeasts to Plants). *Biochem. Biokhimiia* **80**, 400–7.
- 881 **Rottmann, M., Dieter, S., Brunner, H. and Rupp, S.** (2003). A screen in

- 882 *Saccharomyces cerevisiae* identified CaMCM1, an essential gene in *Candida*  
883 *albicans* crucial for morphogenesis. *Mol. Microbiol.* **47**, 943–59.
- 884 **Ruy, F., Vercesi, A. E. and Kowaltowski, A. J.** (2006). Inhibition of specific electron  
885 transport pathways leads to oxidative stress and decreased *Candida albicans*  
886 proliferation. *J. Bioenerg. Biomembr.* **38**, 129–135.
- 887 **Sakajo, S., Minagawa, N. and Yoshimoto, A.** (1997). Effects of Nucleotides on  
888 Cyanide-resistant Respiratory Activity in Mitochondria Isolated from Antimycin  
889 A-treated Yeast *Hansenula anomala*. *Biosci. Biotechnol. Biochem.* **61**, 396–399.
- 890 **Scheckhuber, C. Q., Houthoofd, K., Weil, A. C., Werner, A., de Vreese, A.,**  
891 **Vanfleteren, J. R. and Osiewacz, H. D.** (2011). Alternative oxidase dependent  
892 respiration leads to an increased mitochondrial content in two long-lived mutants  
893 of the ageing model *Podospora anserina*. *PLoS One* **6**,.
- 894 **Schirmer, R. H., Adler, H., Pickhardt, M. and Mandelkow, E.** (2011). “Lest we  
895 forget you - methylene blue...” *Neurobiol. Aging* **32**, 2325.e7-2325.e16.
- 896 **Sellam, A., Tebbji, F. and Nantel, A.** (2009). Role of Ndt80p in sterol metabolism  
897 regulation and azole resistance in *Candida albicans*. *Eukaryot. Cell* **8**, 1174–  
898 1183.
- 899 **Sellam, A., Askew, C., Epp, E., Tebbji, F., Mullick, A., Whiteway, M. and Nantel,**  
900 **A.** (2010). Role of transcription factor CaNdt80p in cell separation, hyphal  
901 growth, and virulence in *Candida albicans*. *Eukaryot. Cell* **9**, 634–644.
- 902 **Sharpe, M. A. and Cooper, C. E.** (1998). Interaction of peroxynitrite with  
903 mitochondrial cytochrome oxidase. Catalytic production of nitric oxide and  
904 irreversible inhibition of enzyme activity. *J. Biol. Chem.* **273**, 30961–72.



- 905 **She, X., Zhang, L., Chen, H., Calderone, R. and Li, D.** (2013). Cell surface  
906 changes in the *Candida albicans* mitochondrial mutant *goa1*Δ are associated  
907 with reduced recognition by innate immune cells. *Cell. Microbiol.* **15**, 1572–  
908 1584.
- 909 **She, X., Khamooshi, K., Gao, Y., Shen, Y., Lv, Y., Calderone, R., Fonzi, W., Liu,  
910 W. and Li, D.** (2015). Fungal-specific subunits of the *Candida albicans*  
911 mitochondrial complex I drive diverse cell functions including cell wall synthesis.  
912 *Cell. Microbiol.* **17**, 1350–64.
- 913 **Siedow, J. and Umbach, A.** (1995). Plant Mitochondrial Electron Transfer and  
914 Molecular Biology. *Plant Cell* **7**, 821–831.
- 915 **Singh, V., Satheesh, S. V., Raghavendra, M. L. and Sadhale, P. P.** (2007). The  
916 key enzyme in galactose metabolism, UDP-galactose-4-epimerase, affects cell-  
917 wall integrity and morphology in *Candida albicans* even in the absence of  
918 galactose. *Fungal Genet. Biol.* **44**, 563–574.
- 919 **Skrzypek MS, Binkley J, Binkley G, Miyasato SR, Simison M, and S. G.** *Candida*  
920 Genome Database. <http://www.candidagenome.org>.
- 921 **Spreghini, E., Davis, D. A., Subaran, R., Kim, M. and Mitchell, A. P.** (2003). Roles  
922 of *Candida albicans* Dfg5p and Dcw1p cell surface proteins in growth and hypha  
923 formation. *Eukaryot. Cell* **2**, 746–755.
- 924 **Sullivan, L. B., Gui, D. Y., Hosios, A. M., Bush, L. N., Freinkman, E. and Vander  
925 Heiden, M. G.** (2015). Supporting Aspartate Biosynthesis Is an Essential  
926 Function of Respiration in Proliferating Cells. *Cell* **162**, 552–563.
- 927 **Thewes, S., Kretschmar, M., Park, H., Schaller, M., Filler, S. G. and Hube, B.**

- 928 (2007). In vivo and ex vivo comparative transcriptional profiling of invasive and  
929 non-invasive *Candida albicans* isolates identifies genes associated with tissue  
930 invasion. *Mol. Microbiol.* **63**, 1606–1628.
- 931 **Thomazella, D. P. T., Teixeira, P. J. P. L., Oliveira, H. C., Saviani, E. E.,**  
932 **Rincones, J., Toni, I. M., Reis, O., Garcia, O., Meinhardt, L. W., Salgado, I.,**  
933 **et al.** (2012). The hemibiotrophic cacao pathogen *Moniliophthora perniciosa*  
934 depends on a mitochondrial alternative oxidase for biotrophic development. *New*  
935 *Phytol.* **194**, 1025–1034.
- 936 **Thompson, J. R., Register, E., Curotto, J., Kurtz, M. and Kelly, R.** (1998). An  
937 improved protocol for the preparation of yeast cells for transformation by  
938 electroporation. *Yeast* **14**, 565–571.
- 939 **Uhl, M. M. A., Biery, M. M., Craig, N. N., Johnson, A. D. A., Altschul, S., Madden,**  
940 **T., Schaffer, A., Zhang, J., Zhang, Z., Miller, W., et al.** (2003).  
941 Haploinsufficiency-based large-scale forward genetic analysis of filamentous  
942 growth in the diploid human fungal pathogen *C. albicans*. *EMBO J.* **22**, 2668–  
943 2678.
- 944 **Umbach, A. L. and Siedow, J. N.** (2000). The cyanide-resistant alternative oxidases  
945 from the fungi *Pichia stipitis* and *Neurospora crassa* are monomeric and lack  
946 regulatory features of the plant enzyme. *Arch. Biochem. Biophys.* **378**, 234–245.
- 947 **Vanderleyden, J., Peeters, C., Verachtert, H. and Bertrand, H.** (1980). Stimulation  
948 of the alternative oxidase of *Neurospora crassa* by Nucleoside phosphates.  
949 *Biochem. J.* **188**, 141–4.
- 950 **Vanlerberghe, G. C.** (2013). Alternative oxidase: A mitochondrial respiratory  
951 pathway to maintain metabolic and signaling homeostasis during abiotic and

- 952 biotic stress in plants. *Int. J. Mol. Sci.* **14**, 6805–6847.
- 953 **Vazquez-Torres, A., Jones-Carson, J. and Balish, E.** (1996). Peroxynitrite  
954 contributes to the candidacidal activity of nitric oxide- producing macrophages.  
955 *Infect. Immun.* **64**, 3127–3133.
- 956 **Watanabe, T., Ogasawara, A., Mikami, T. and Matsumoto, T.** (2006). Hyphal  
957 formation of *Candida albicans* is controlled by electron transfer system.  
958 *Biochem. Biophys. Res. Commun.* **348**, 206–211.
- 959 **Xu, T., Yao, F., Liang, W.-S., Li, Y.-H., Li, D.-R., Wang, H. and Wang, Z.-Y.** (2012).  
960 Involvement of alternative oxidase in the regulation of growth, development, and  
961 resistance to oxidative stress of *Sclerotinia sclerotiorum*. *J. Microbiol.* **50**, 594–  
962 602.
- 963 **Yabu, Y., Yoshida, A., Suzuki, T., Nihei, C., Kawai, K., Minagawa, N., Hosokawa,**  
964 **T., Nagai, K., Kita, K. and Ohta, N.** (2003). The efficacy of ascofuranone in a  
965 consecutive treatment on *Trypanosoma brucei brucei* in mice. *Parasitol. Int.* **52**,  
966 155–64.
- 967 **Yan, L., Li, M., Cao, Y., Gao, P., Cao, Y., Wang, Y. and Jiang, Y.** (2009). The  
968 alternative oxidase of *Candida albicans* causes reduced fluconazole  
969 susceptibility. *J. Antimicrob. Chemother.* **64**, 764–773.
- 970
- 971

972 **Figure Legends**

973

974 **Figure 1. AOX restores respiration rapidly following ETC inhibition**

975 **A.** RT-PCR was used to monitor *AOX2* expression after 15 and 30 min exposure to 1  
976 mM KCN. **B.** Immunoblot of *Aox2* following 1 mM KCN, 1 mM salicylhydroxamic acid  
977 (SHAM) or 1 mM sodium nitroprusside (SNP) treatment for 2 h. Coomassie stained  
978 gel is shown as a loading control. **C.** Immunoblot to monitor *Aox2* protein over time  
979 following SNP exposure in the wild-type strain and the *aox2-aox1Δ* mutant.  
980 **D.** Respirometry analysis of the wild-type strain and *aox-aox1Δ* mutant. Routine  
981 respiration was recorded immediately prior to the addition of drugs. SNP and SHAM  
982 were added to give 1- and 2 mM final concentrations. A final addition of 2 mM KCN  
983 was used to inhibit remaining respiration. Respiration measurements were recorded 5  
984 min after addition of each respective drug. The recovery of respiration was measured  
985 20 min after the first addition of SNP. **E.** Summary of data from three independent  
986 respirometry experiments. Results are presented as means  $\pm$  standard deviation.  
987 Student's t-test was used to compare groups, \* $p < 0.01$ .

988

989 **Figure 2. Increased Aox activity elevates resistance to ETC inhibition**

990 Representative examples of respirometry experiments using *AOX2* overexpression  
991 strains: **A.** *aox2aox1Δ* control, **B.** *aox2aox1Δ::AOX2*, **C.** *AOX2* overexpression strain.  
992 KCN and SHAM were added sequentially to 1- and 2 mM final concentrations. The  
993 blue line shows oxygen concentration and red/green lines show the  $O_2$ -flux.

994

995

996 **Figure 3. Loss of AOX function does not affect the cell wall integrity or**  
997 **macrophage recognition**

998 **A.** The wild-type or *aox-aox1*Δ mutant were spotted onto plates containing 25 μg/ml  
999 Calcofluor White (CFW) or 50 μg/ml Congo Red. **B.** Wild-type *C. albicans* were grown  
1000 with or without treatment with 1 mM SHAM for 18 h, washed and co-incubated with  
1001 J774.1 macrophages. Representative examples of uptake by macrophages are  
1002 shown. **C.** Summary of *C. albicans* uptake by macrophages for three independent  
1003 experiments. At least 200 *C. albicans* cells were counted per experiment. Results are  
1004 presented as means ± standard deviation. Student's t-test was used to compare  
1005 groups.

1006

1007 **Figure 4. Aox2 levels affect the yeast-to-hypha transition**

1008 **A.** Representative examples of Wild-type, *aox2-aox1*Δ mutant and *AOX2* re-  
1009 integration strain overexpressing *AOX2* were grown in RPMI at 37 °C for 16 h and **B,**  
1010 analysis of percentage of hyphal cells from three independent experiments. **C.**  
1011 Representative examples of wild-type and *AOX2* overexpression strains grown in  
1012 serum-containing media for 90 min and **D,** analysis of percentage of hyphal cells from  
1013 three independent experiments. At least 500 cells were counted per experiment.  
1014 Results are presented as mean ± standard deviation. Student's t-test was used to  
1015 compare groups, \*p<0.01.

1016

1017 **Figure 5. Global transcription changes upon deletion of AOX2 or treatment with**  
1018 **SHAM**

1019 **A.** Overlap in differentially expressed genes between *aox2*Δ and SHAM-treated cells  
1020 by RNAseq analysis. A selection of differentially expressed genes in **B,** SHAM-treated

1021 cells and **C**, *aox2* $\Delta$ . Genes were grouped by GO term, with log<sub>2</sub>-fold change vs.  
1022 untreated wild-type shown. Green depicts downregulated genes and red/yellow  
1023 depicts upregulated genes. Differentially expressed genes were identified by Cuffdiff  
1024 v2.1.1, with  $q < 0.05$  being considered statistically significant.

1025

1026 **Figure 6. Deletion of AOX2 causes decreased virulence in the zebrafish model**  
1027 **of systemic candidiasis but not in the mouse model**

1028 Two day-old zebrafish larvae were injected with **A**. 100 cfu or **B**. 500 cfu *C. albicans*  
1029 wild-type, *aox2* $\Delta$  or *aox2-aox1* $\Delta$  cells. Survival curves constructed from data collected  
1030 over a 48 h period are shown. **B**. Wild-type or *aox2-aox1* $\Delta$  cells were used within a  
1031 murine infection model as described in materials and methods. Percentage weight  
1032 loss, fungal kidney burden and calculated outcome score are presented as mean  $\pm$   
1033 standard deviation, n=6 mice per group. Student's t-test was used to compare groups.

1034

1035 **Figure 7. Pyocyanin inhibits alternative respiration.**

1036 **A**. The effect of pyocyanin (PYO) on alternative respiration was investigated in wild-  
1037 type *C. albicans*. Routine respiration was measured immediately before the addition  
1038 of drugs. KCN was added to final concentration of 0.5 mM and KCN-inhibited  
1039 respiration was recorded after 5 min. KCN was added a second time as indicated to a  
1040 final concentration of 1 mM to confirm cyanide-insensitive respiration, after which  
1041 Aox2-induced respiration was recorded. PYO was added to final concentration of  
1042 80  $\mu$ M, after which PYO-inhibited respiration was measured. **B**. The effect of PYO on  
1043 induction of Aox activity was investigated concurrently using the same schedule of  
1044 drug addition and measurements as in **(A)**, except that PYO was added initially as  
1045 indicated to a final concentration of 80  $\mu$ M (an equal volume of the solvent ethanol was

1046 added in **(A)** as a control). The blue line shows oxygen concentration and red/green  
1047 lines show the O<sub>2</sub>-flow per cells. **C.** Summary of results from four independent  
1048 respirometry experiments performed as in **(A)**. Results are presented as mean ±  
1049 standard deviation, Student's t-test was used to compare groups, \*p<0.05. **D.** A  
1050 selection of differentially expressed genes in cells treated with Pyocyanin (80μM) for  
1051 30 min when compared to untreated is presented. Genes are grouped by GO term,  
1052 with log<sub>2</sub>-fold change vs. untreated wild-type shown. Green depicts downregulated  
1053 genes and red/yellow depicts upregulated genes. Differentially expressed genes were  
1054 identified by Cuffdiff v2.1.1, with q<0.05 being considered statistically significant.

1055

1056

1057 **Supplementary figures**

1058

1059 **Figure S1. Confirmation of deletion of AOX genes**

1060 Deletion of *AOX2* and *AOX2-AOX1* region. **A.** PCR to confirm the disruption of *AOX1*  
1061 in the *aox2-aox1Δ* mutant and corresponding *AOX2* overexpression strain, using  
1062 primers *AOX1* flank F and *AOX1* flank R. **B.** PCR to confirm disruption of *AOX2* in the  
1063 *aox2-aox1Δ* mutant and reintegration in the corresponding *AOX2* overexpression  
1064 strain, using primers *AOX2* ORF F and *AOX2* ORF R. **C.** RT-PCR for the presence  
1065 of *AOX2* transcripts in the wild-type strain and in *aox2-aox1Δ* from cells treated with  
1066 1 mM KCN for 1 hour, using increasing amounts of template cDNA. **D.** The wild-type  
1067 or *aox2-aox1Δ* mutant were spotted onto plates containing 1 mM SNP or 10 μg/ml  
1068 methylene blue. Growth was evaluated after 48 h. Results are representative of at  
1069 least three independent experiments.

1070

1071 **Figure S2. Whole cell respirometry data showing Aox induction after KCN**  
1072 **inhibition.**

1073 Inhibition of respiration with 1 mM KCN induces Aox activity within 20 minutes. Aox  
1074 activity is inhibited by addition of 1 mM SHAM.

1075

1076 **Figure S3. Dectin-1 staining of wild type and *aox2-aox1Δ* cells**

1077 Representative examples showing dectin-1 staining of **A.** wild-type SC5314 and **B.**  
1078 *aox2-aox1Δ* *C. albicans*. Images were captured with GFP settings with low brightfield  
1079 illumination. **C.** Wild-type *C. albicans* grown overnight in the presence of 10 ng/ml  
1080 caspofungin overnight is shown as a positive control.

1081



1082 **Figure S4. SHAM inhibits filamentation.**

1083 Inhibition of filamentation by 3.2 mM SHAM during growth on RPMI agar at 37 °C for  
1084 48 h.

1085

1086 **Supplementary Table S1. *C. albicans* strains used in this study**

1087

1088 **Supplementary Table S2. Primers used in this study**

1089

1090 **Supplementary Table S3. Differentially expressed genes between wild-type and**  
1091 ***aox2Δ* strains analysed by RNAseq**

1092

1093 **Supplementary Table S4. Differentially expressed genes between untreated**  
1094 **SHAM-treated *C. albicans* analysed by RNAseq**

1095

1096 **Supplementary Table S5. Differentially expressed genes between untreated**  
1097 **pyocyanin-treated *C. albicans* analysed by RNAseq**

1098

1099

1100

Figure 1

bioRxiv preprint doi: <https://doi.org/10.1101/405670>; this version posted August 31, 2018. The copyright holder for this preprint (which was not certified by peer review) is the author/funder. All rights reserved. No reuse allowed without permission.

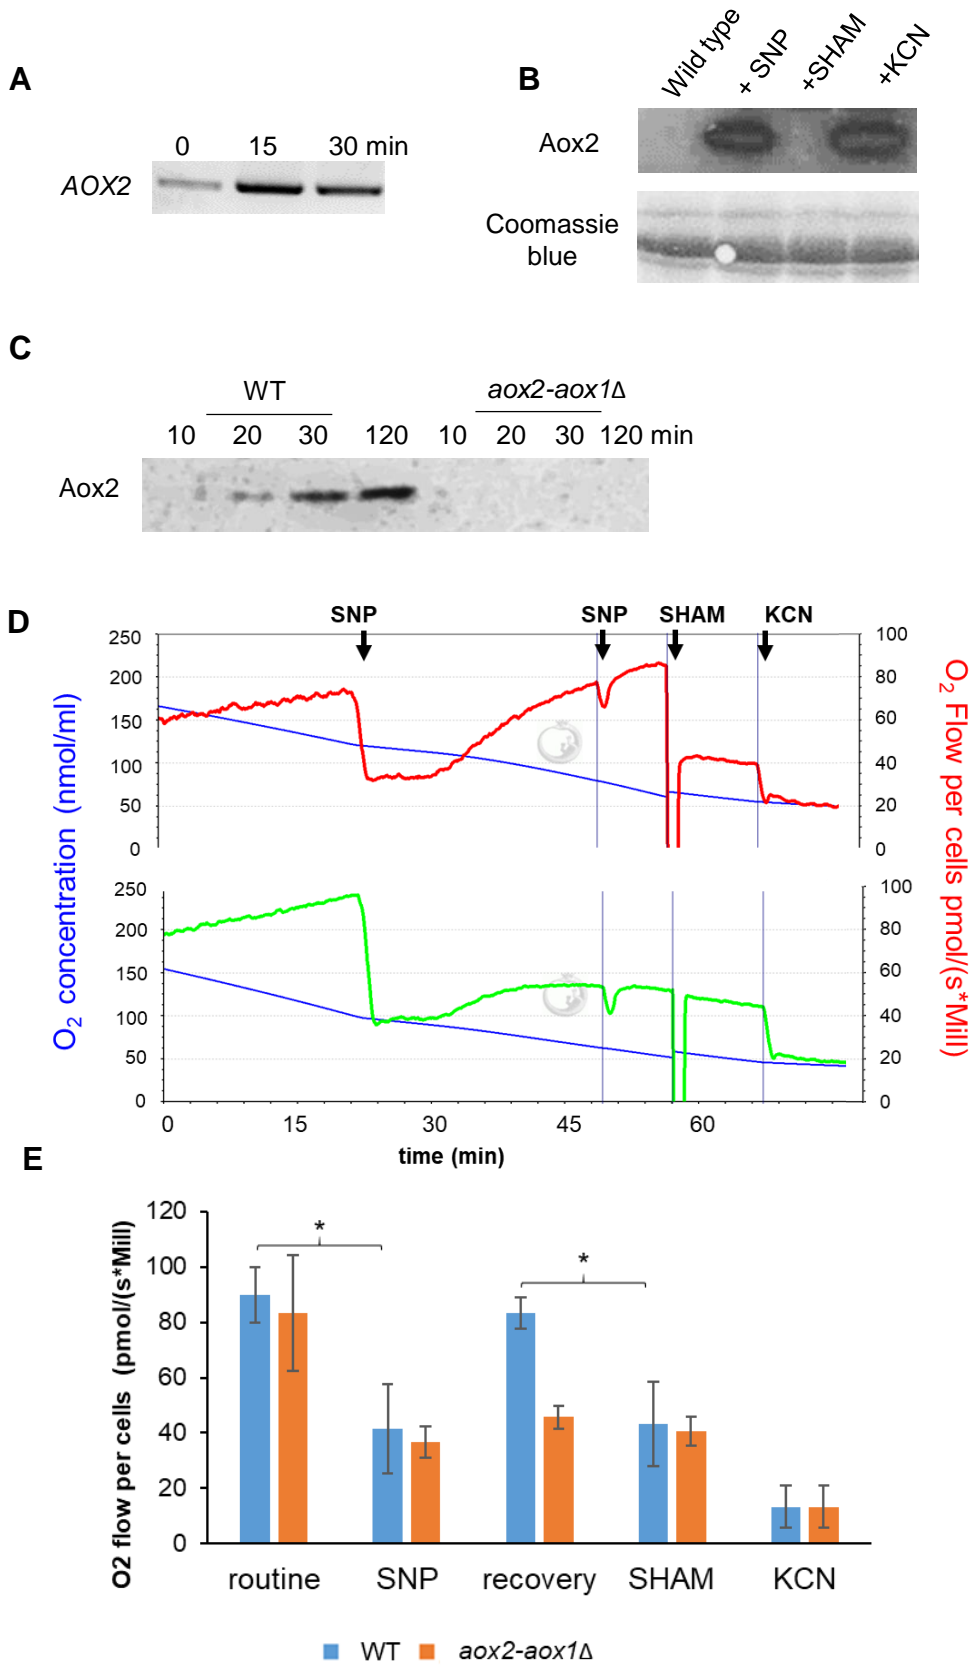

Figure 2

bioRxiv preprint doi: <https://doi.org/10.1101/405670>; this version posted August 31, 2018. The copyright holder for this preprint (which was not certified by peer review) is the author/funder. All rights reserved. No reuse allowed without permission.

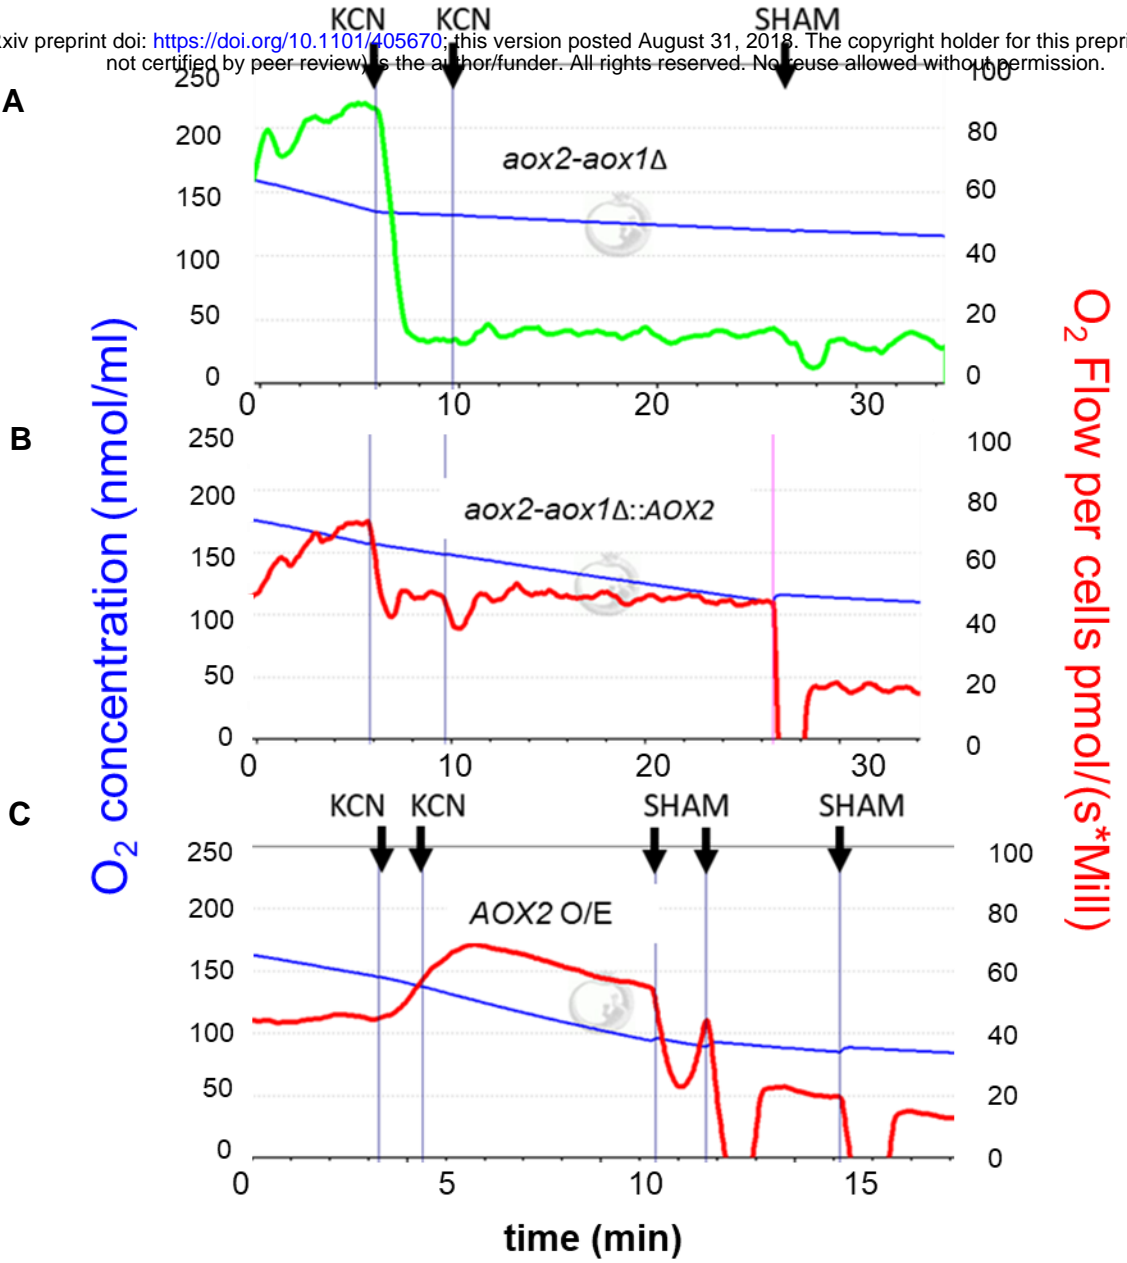

**Figure 3**

bioRxiv preprint doi: <https://doi.org/10.1101/405670>; this version posted August 31, 2018. The copyright holder for this preprint (which was not certified by peer review) is the author/funder. All rights reserved. No reuse allowed without permission.

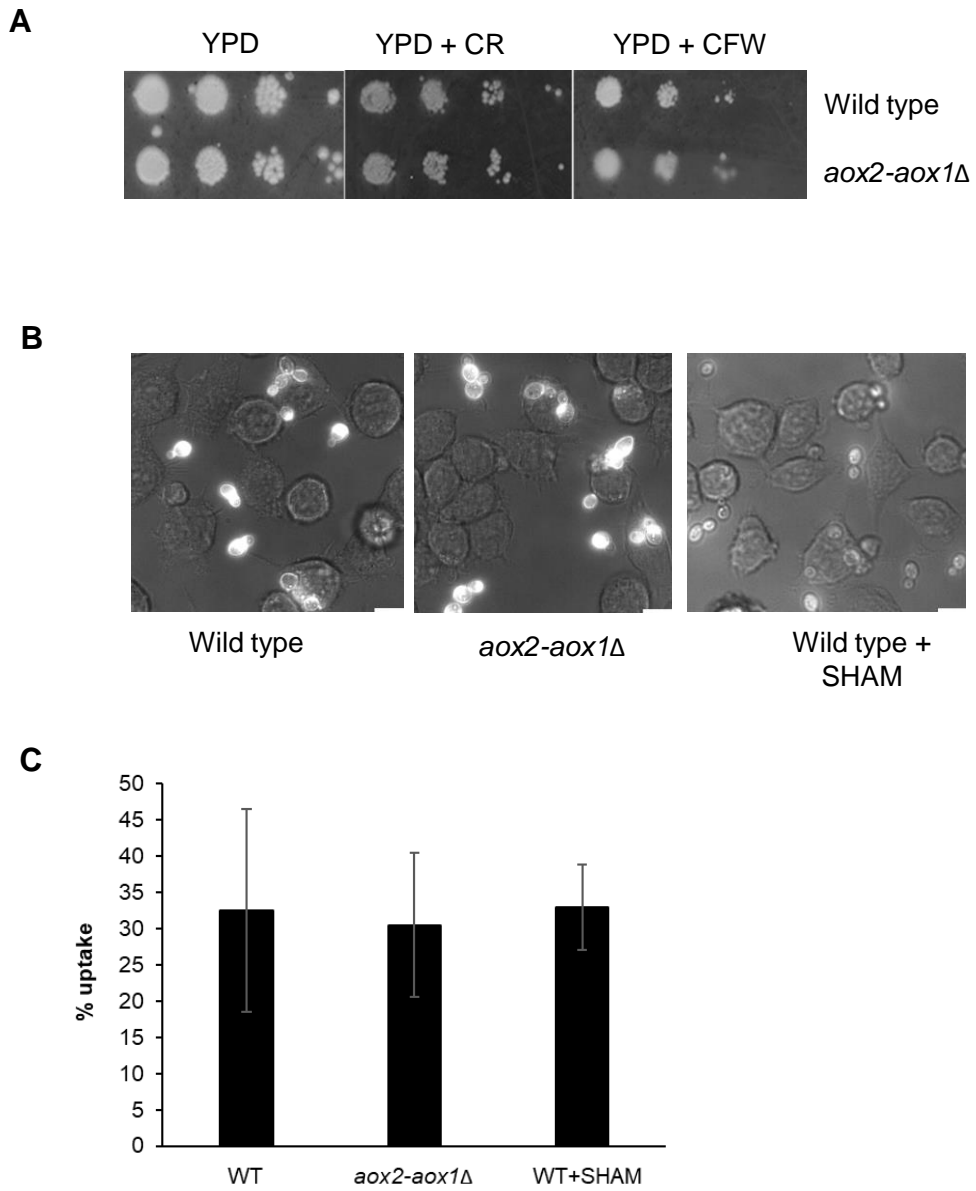

Figure 4

bioRxiv preprint doi: <https://doi.org/10.1101/405670>; this version posted August 31, 2018. The copyright holder for this preprint (which was not certified by peer review) is the author/funder. All rights reserved. No reuse allowed without permission.

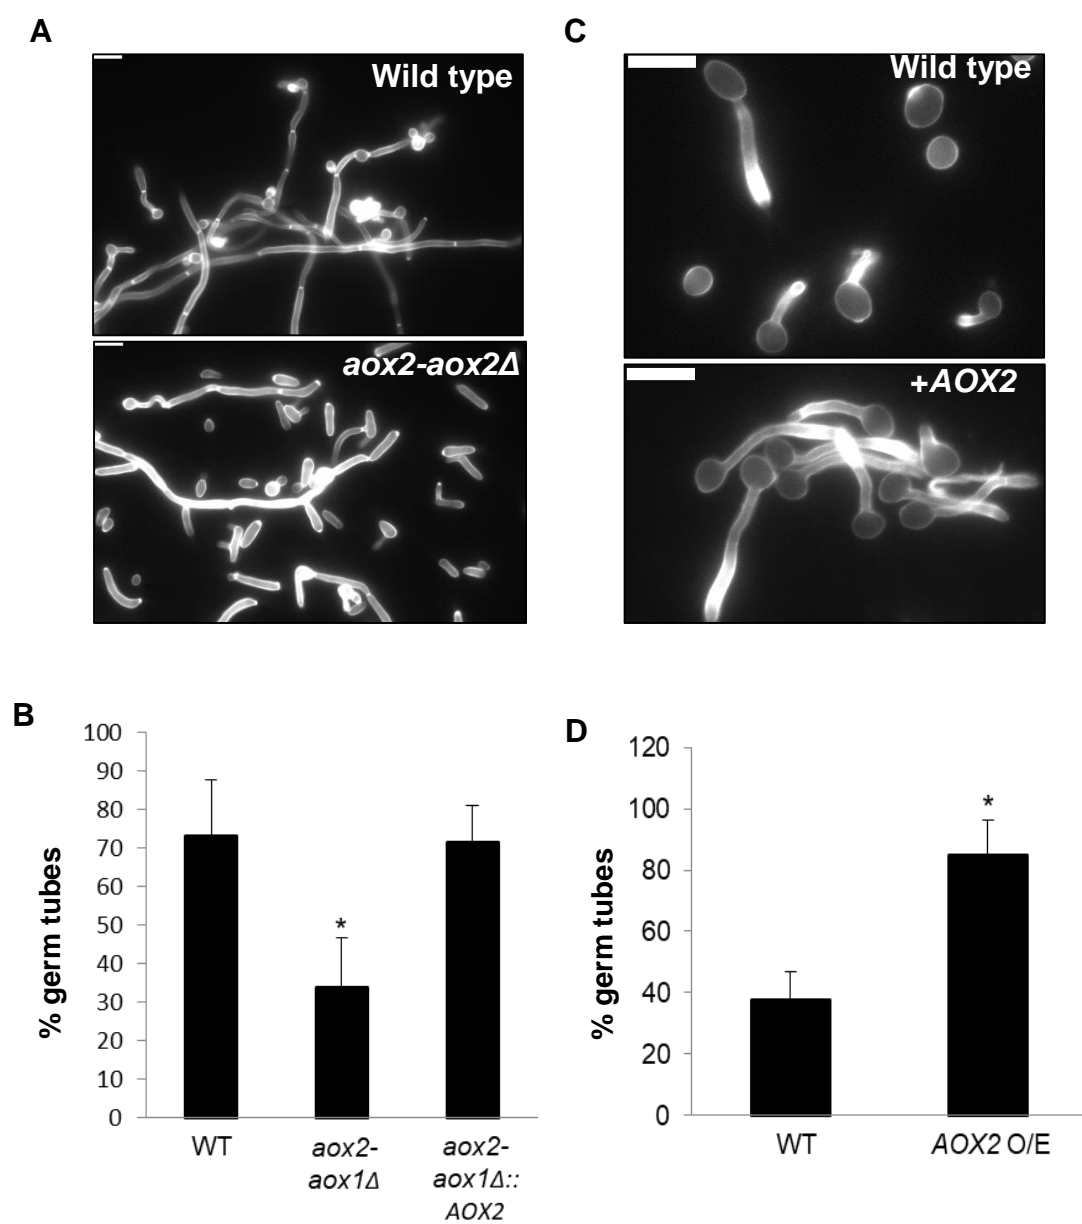

**Figure 5**

**A**

*GLX3, HCM1, RHR2* ↑ *SKO1, CZF1, TRY6,* *MDR1* ↓  
*HSP21, -70, -104* ↑ *SFL2, RFG1, PDE2,* *DFG5* ↓  
*ALS1, MNN4* ↑ *FGR22, MIG1* ↑ *BNA31* ↓

bioRxiv preprint doi: <https://doi.org/10.1101/405670>; this version posted August 31, 2018. The copyright holder for this preprint (which was not certified by peer review) is the author/funder. All rights reserved. No reuse allowed without permission.

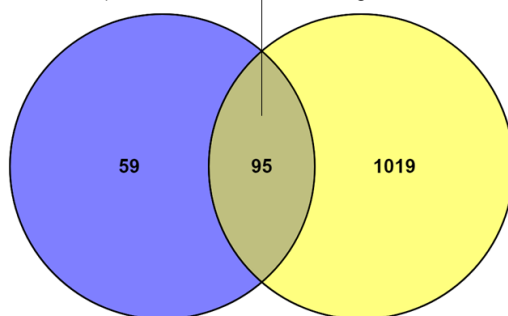

**B**

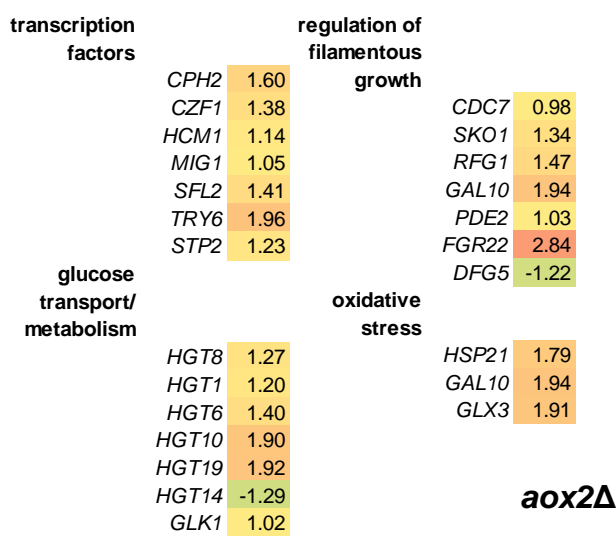

**C**

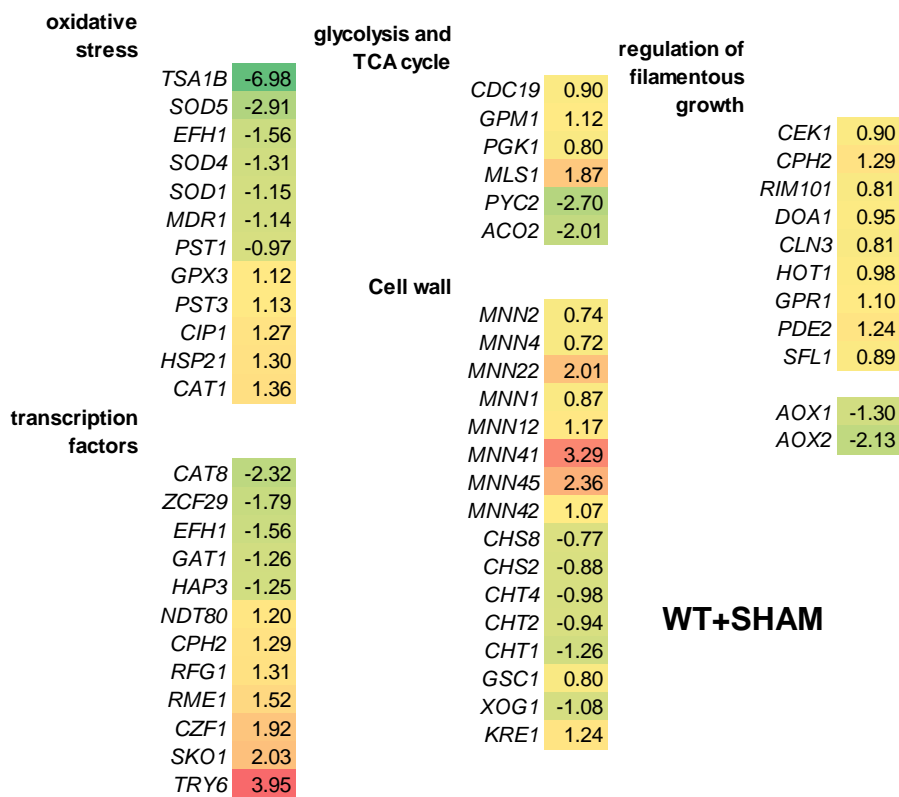

log<sub>2</sub>-fold change

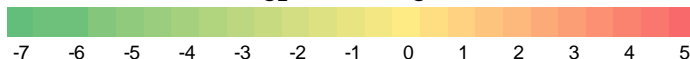

**Figure 6**

bioRxiv preprint doi: <https://doi.org/10.1101/405670>; this version posted August 31, 2018. The copyright holder for this preprint (which was not certified by peer review) is the author/funder. All rights reserved. No reuse allowed without permission.

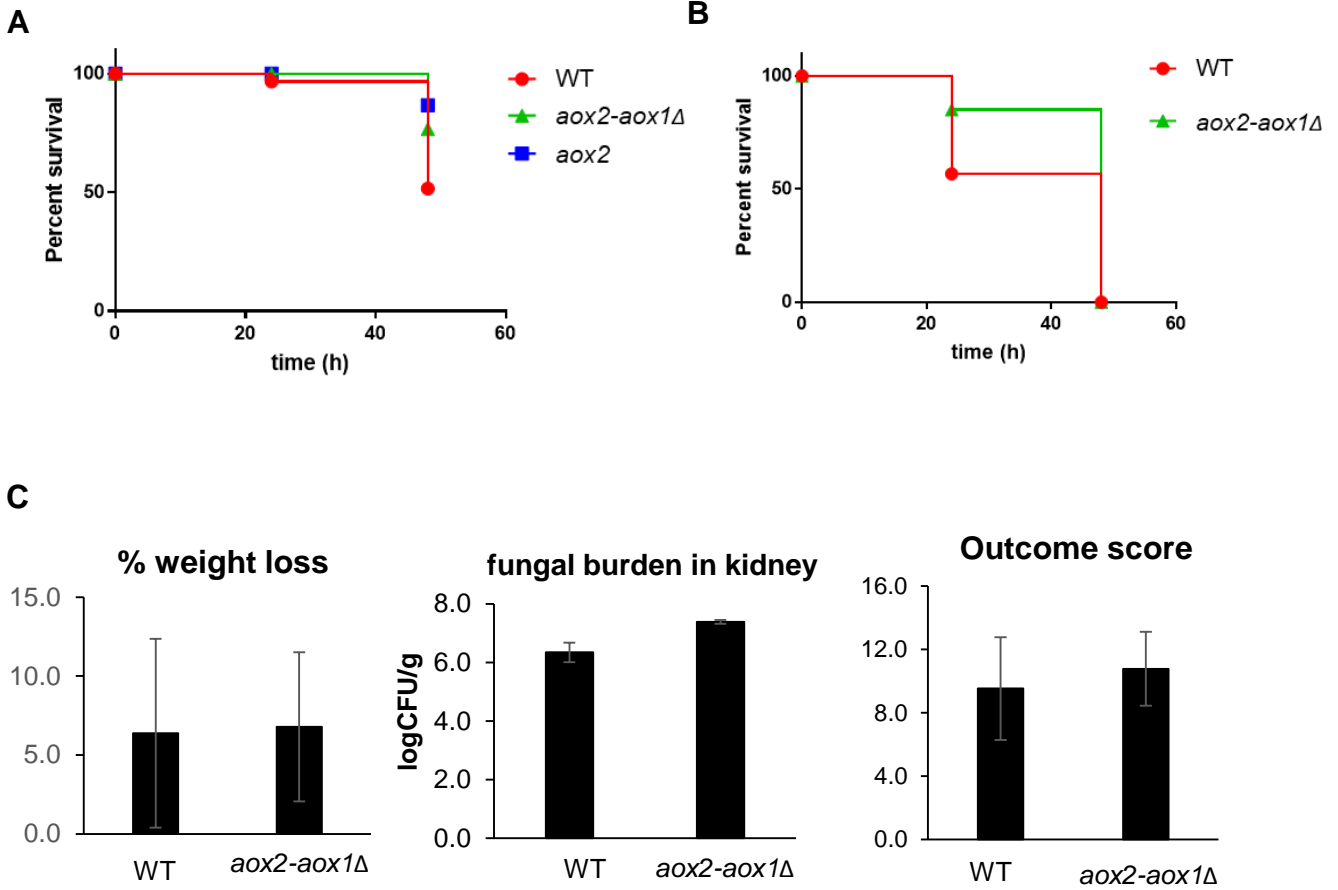

Figure 7

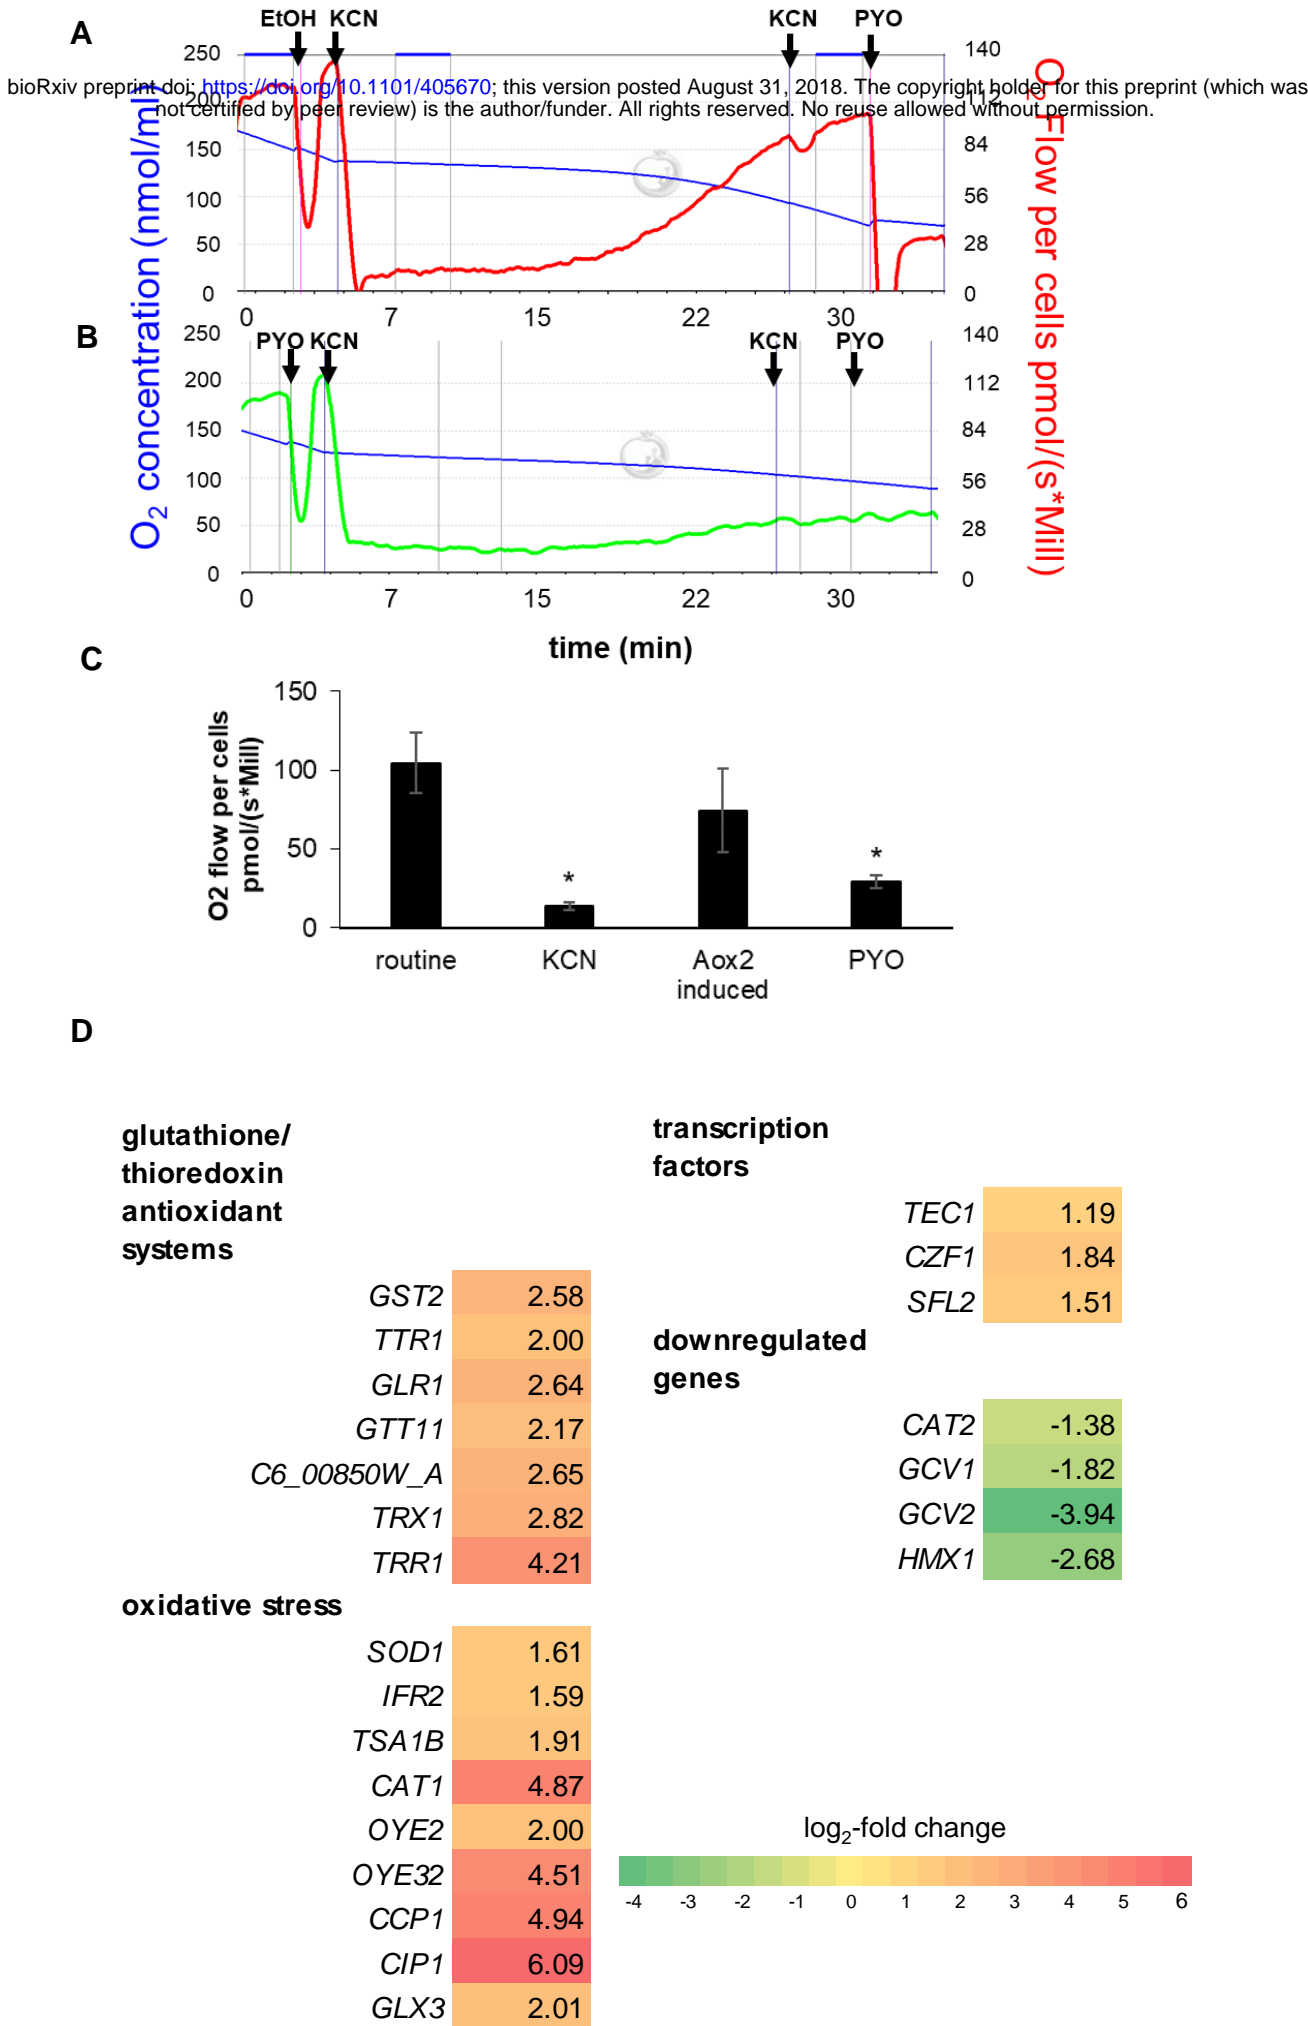



# Supplementary data

## Supplementary data Figure S1

bioRxiv preprint doi: <https://doi.org/10.1101/405670>; this version posted August 31, 2018. The copyright holder for this preprint (which was not certified by peer review) is the author/funder. All rights reserved. No reuse allowed without permission.

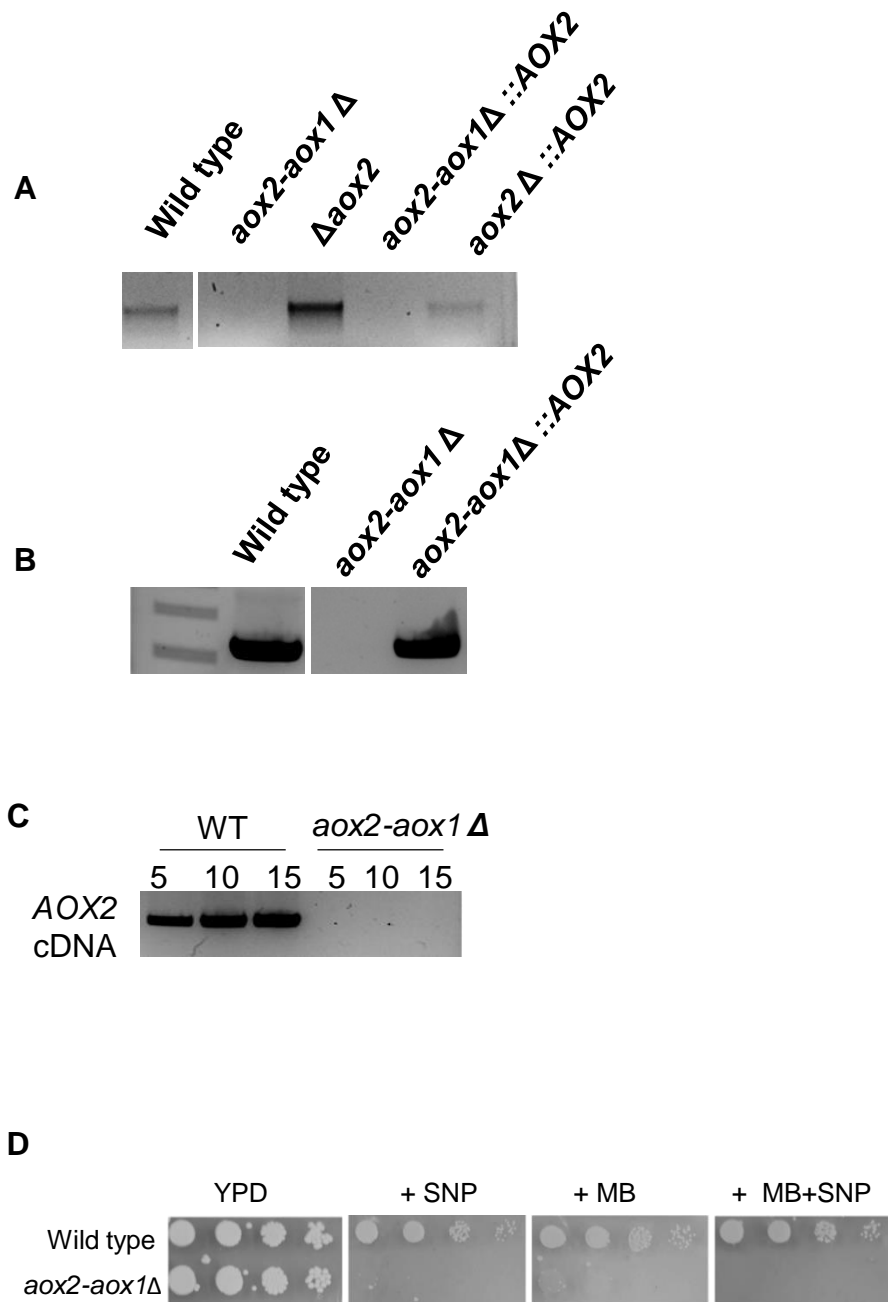

## Supplementary data

### Supplementary data Figure S2

bioRxiv preprint doi: <https://doi.org/10.1101/405670>; this version posted August 31, 2018. The copyright holder for this preprint (which was not certified by peer review) is the author/funder. All rights reserved. No reuse allowed without permission.

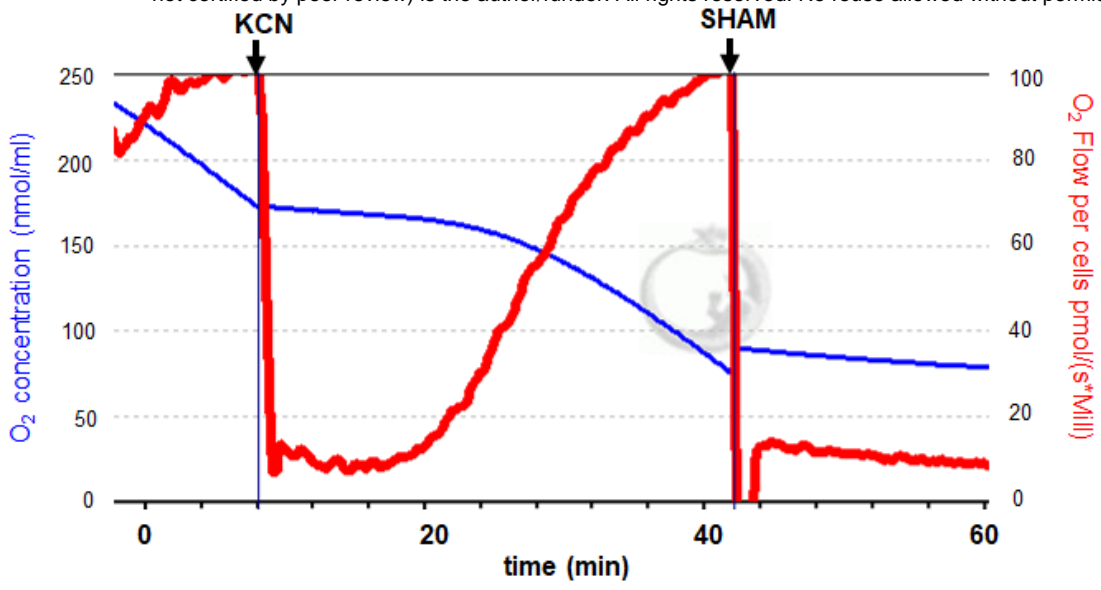

## Supplementary data

### Supplementary data Figure S3

bioRxiv preprint doi: <https://doi.org/10.1101/405670>; this version posted August 31, 2018. The copyright holder for this preprint (which was not certified by peer review) is the author/funder. All rights reserved. No reuse allowed without permission.

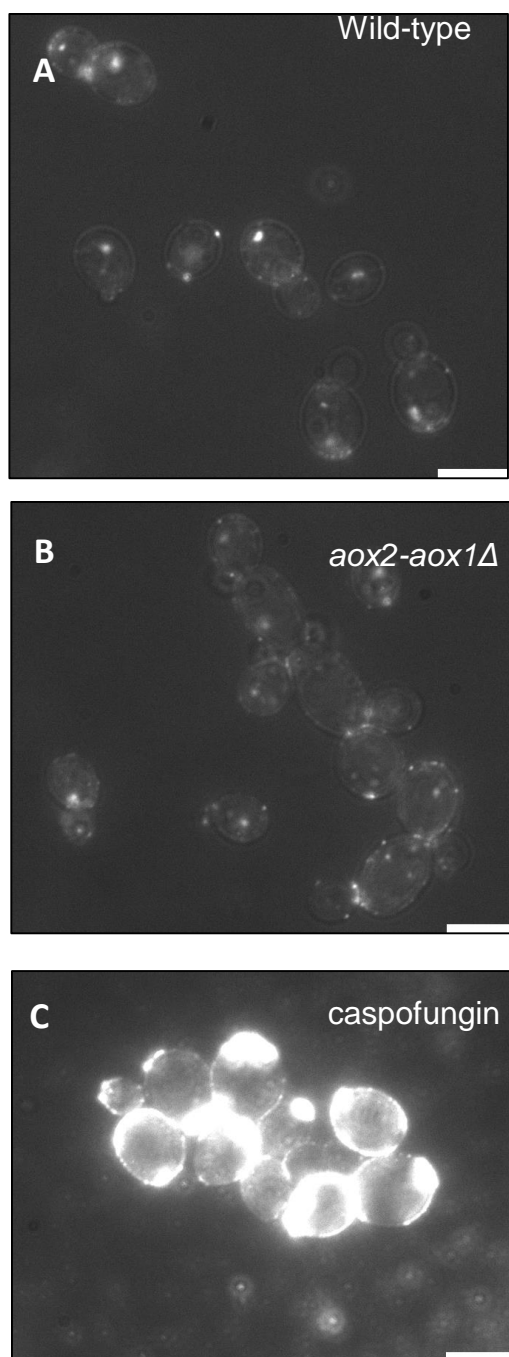

## Supplementary data

### Supplementary data Figure S4

bioRxiv preprint doi: <https://doi.org/10.1101/405670>; this version posted August 31, 2018. The copyright holder for this preprint (which was not certified by peer review) is the author/funder. All rights reserved. No reuse allowed without permission.

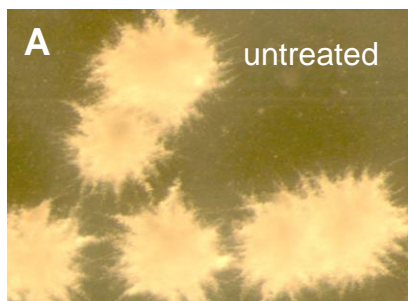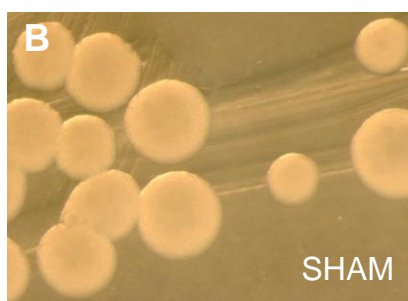

**Supplementary data Table S1. *C. albicans* strains used in this study**

| Strain                     | Genotype                                                                                                                | Source       |
|----------------------------|-------------------------------------------------------------------------------------------------------------------------|--------------|
| SC5314                     | Typed strain                                                                                                            | Typed strain |
| SN87                       | <i>his/his1 leu2/leu2</i><br><i>URA3/ura3::imm434 iro1::IRO1/iro1::imm434</i>                                           | [17]         |
| SN152                      | <i>arg4/arg4 his/his1 leu2/leu2</i><br><i>URA3/ura3::imm434 iro1::IRO1/iro1::imm434</i>                                 | [17]         |
| <i>aox2Δ</i>               | <i>arg4/arg4 his/his1 leu2/leu2</i><br><i>URA3/ura3::imm434 iro1::IRO1/iro1::imm434</i><br><i>aox2::LEU2/aox2::HIS1</i> | This work    |
| <i>aox2-aox1Δ</i>          | <i>his/his1 leu2/leu2</i><br><i>URA3/ura3::imm434 iro1::IRO1/iro1::imm434 aox2-aox1::LEU2/aox2-aox1::HIS1</i>           | This work    |
| <i>aox2-aox1Δ::AOX2</i>    | As for $\Delta$ <i>aox2-aox1</i> , <i>ADH1/adh1::pNIM-AOX2</i>                                                          | This work    |
| <i>AOX2</i> overexpression | <i>ADH1/adh1::pNIM-AOX2</i>                                                                                             | This work    |

bioRxiv preprint doi: <https://doi.org/10.1101/405676>; this version posted August 31, 2018. The copyright holder for this preprint (which was not certified by peer review) is the author/funder. All rights reserved. No reuse allowed without permission.

**Supplementary data Table S2. Primers used in this study**

|              |                                                                                                               |
|--------------|---------------------------------------------------------------------------------------------------------------|
| AOX2-UP2     | atgcttactgcttcgctttacaacaattaccggtgtaaccaccacagctacttcaacat<br>attcttcattagattat <b>ACCAGTGTGATGGATATCTGC</b> |
| AOX1-UP5     | Ctaaagatacaaatcctttctttccatccttggggctagttacatctaaattgaattggtt<br>gtggcttgtctgaatAGCTCGGATCCACTAGTAACG         |
| AOX2-UP5     | Ttataattgtaaactctgttttccaaccagttggtctcatcacattattccatgattagggtg<br>aggtttatttaaacAGCTCGGATCCACTAGTAACG        |
| AOX2 ORF F   | taattaCTCGAGatgcttactgcttcgctttac                                                                             |
| AOX2 ORF R   | gagagaGGATCCttataattgtaaactctgttttcc                                                                          |
| AOX1 flank F | tgctcggaaaggtaatac                                                                                            |
| AOX1 flank R | cggctcggattttctttcac                                                                                          |

bioRxiv preprint doi: <https://doi.org/10.1101/405870>; this version posted August 31, 2018. The copyright holder for this preprint (which was not certified by peer review) is the author/funder. All rights reserved. No reuse allowed without permission.
